# Supplementary material for: 1-Adamantanamine-based triazole-appended organosilanes as chromogenic “naked-eye” and fluorogenic “turn-on” sensors for the highly selective detection of Sn2+ ions
Source: Royal Society of Chemistry journal article supplement (doi:10.1039/d2nj00241h), 2022-01-01
Supplement: d2nj00241h1.pdf [file d2nj00241h1.pdf]

**1-Adamantanamine based triazole appended organosilanes as chromogenic  
“naked-eye” and fluorogenic “turn-on” sensors for highly selective detection  
of Sn<sup>2+</sup> ions**

Gurjaspreet Singh <sup>a\*</sup>, Jashan Deep Kaur <sup>a\*</sup>, Pawan <sup>a</sup>, Diksha <sup>a</sup>, Sushma <sup>a</sup>, Suman <sup>a</sup>, Shilpy. <sup>a</sup>, Pinky  
Satija <sup>b</sup>, K.N. Singh <sup>a</sup>

<sup>a</sup>Department of Chemistry, Panjab University, Chandigarh 160014, India

<sup>b</sup>School of Advanced Chemical Sciences, Shoolini University, Solan, Himachal Pradesh, India

\*Corresponding Authors

1. Prof. Gurjaspreet Singh

Department of Chemistry & Centre of Advanced Studies

Panjab University, Chandigarh, India

Email: [gipsingh@pu.ac.in](mailto:gipsingh@pu.ac.in)

— Tel. No: 0172-2534428, 09814302099, 9317502099

Fax No: 0172-2545074

2. Jashan Deep Kaur

Research Scholar,

Department of Chemistry, Panjab University, Chandigarh, India

Email: [jashandeepkaur.pu@gmail.com](mailto:jashandeepkaur.pu@gmail.com)

## Table of Contents:

|                                                       |    |
|-------------------------------------------------------|----|
| 1. <sup>1</sup> H NMR spectrum of compound 3a .....   | 4  |
| 2. <sup>1</sup> H NMR spectrum of compound 3b .....   | 5  |
| 3. <sup>1</sup> H NMR spectrum of compound 3c .....   | 6  |
| 4. <sup>1</sup> H NMR spectrum of compound 3d .....   | 7  |
| 5. <sup>1</sup> H NMR spectrum of compound 4a .....   | 8  |
| 6. <sup>1</sup> H NMR spectrum of compound 4b .....   | 9  |
| 7. <sup>1</sup> H NMR spectrum of compound 4c.....    | 10 |
| 8. <sup>1</sup> H NMR spectrum of compound 4d .....   | 11 |
| 9. <sup>13</sup> C NMR spectrum of compound 3a .....  | 12 |
| 10. <sup>13</sup> C NMR spectrum of compound 3b ..... | 13 |
| 11. <sup>13</sup> C NMR spectrum of compound 3c ..... | 14 |
| 12. <sup>13</sup> C NMR spectrum of compound 3d.....  | 15 |
| 13. <sup>13</sup> C NMR spectrum of compound 4a.....  | 16 |
| 14. <sup>13</sup> C NMR spectrum of compound 4b.....  | 17 |
| 15. <sup>13</sup> C NMR spectrum of compound 4c.....  | 18 |
| 16. <sup>13</sup> C NMR spectrum of compound 4d.....  | 19 |
| 17. Mass NMR spectrum of compound 3a .....            | 20 |
| 18. Mass NMR spectrum of compound 3b.....             | 20 |
| 19. Mass NMR spectrum of compound 3c .....            | 21 |
| 20. Mass NMR spectrum of compound 3d .....            | 21 |
| 21. Mass NMR spectrum of compound 4a.....             | 22 |
| 22. Mass NMR spectrum of compound 4b .....            | 22 |
| 23. Mass NMR spectrum of compound 4c .....            | 23 |

|                                                                                                          |    |
|----------------------------------------------------------------------------------------------------------|----|
| <b>24.</b> Mass NMR spectrum of compound 4d .....                                                        | 23 |
| <b>25.</b> UV-Visible spectra of 4(a-d) in methanol.....                                                 | 24 |
| <b>26.</b> Visual recognition of 4(b-d) in daylight in the presence of Sn <sup>2+</sup> ions .....       | 24 |
| <b>27.</b> Job's plots for the complexation of 4(a-d) with Sn <sup>2+</sup> ions .....                   | 25 |
| <b>28.</b> B-H plots for 4(a-d) with Sn <sup>2+</sup> ions from UV.....                                  | 26 |
| <b>29.</b> LOD plots of 4(a-d) for Sn <sup>2+</sup> ions from UV .....                                   | 27 |
| <b>30.</b> Fluorescence emission of 4(b-d) in the presence of Sn <sup>2+</sup> ions.....                 | 28 |
| <b>31.</b> B-H plots for 4(a-d) with Sn <sup>2+</sup> ions from fluorescence.....                        | 28 |
| <b>32.</b> LOD plots of 4(a-d) for Sn <sup>2+</sup> ions from fluorescence.....                          | 29 |
| <b>33.</b> pH effect on fluorescence intensity of compounds (4a-4d) .....                                | 30 |
| <b>34.</b> <sup>1</sup> H NMR spectrum of compound 4a-Sn <sup>2+</sup> .....                             | 31 |
| <b>35.</b> Plot of ΔF as function of concentration of Sn <sup>2+</sup> .....                             | 32 |
| <b>36.</b> UV-visible absorption spectra of 4(a-d) in presence of Sn <sup>4+</sup> ions in methanol..... | 33 |

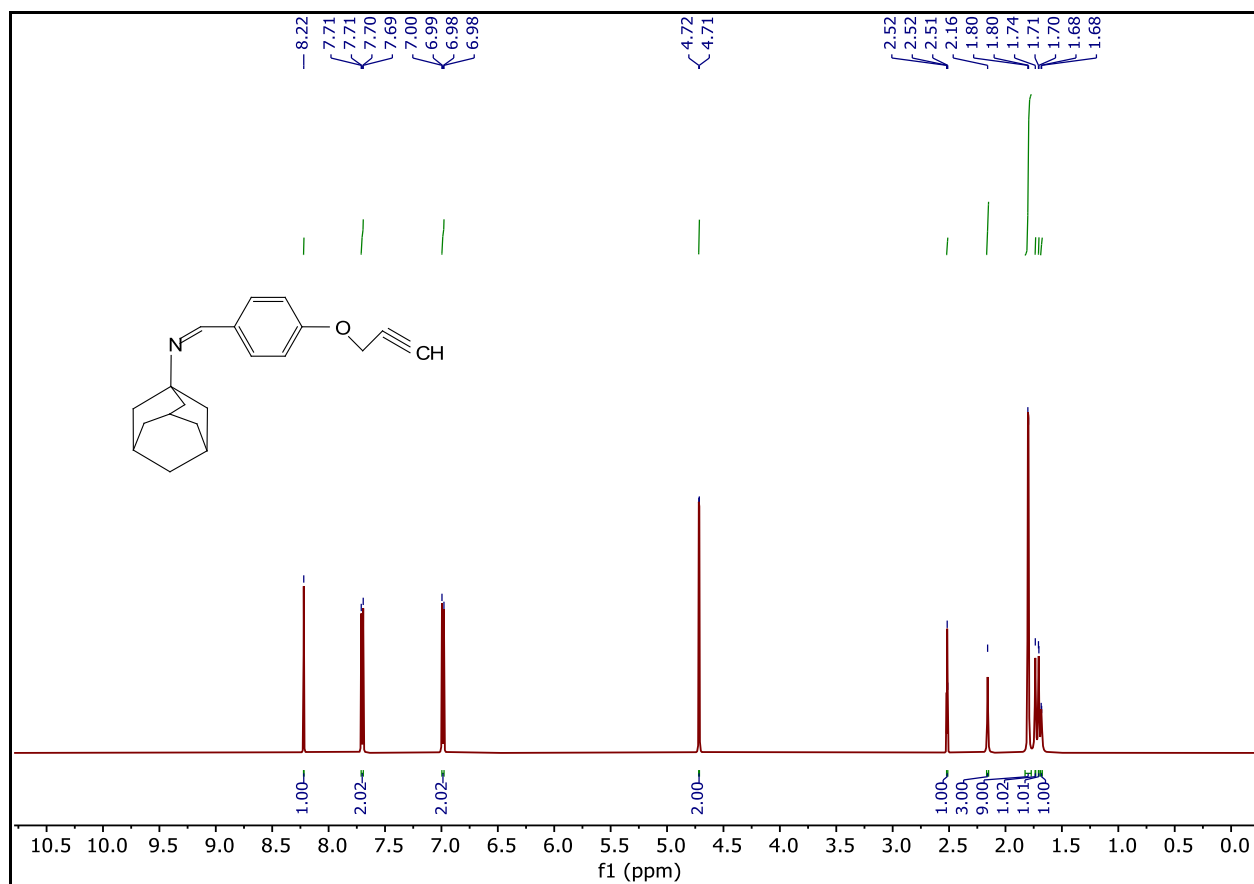

**Fig.S1:**  $^1\text{H}$  NMR spectrum of compound 3a

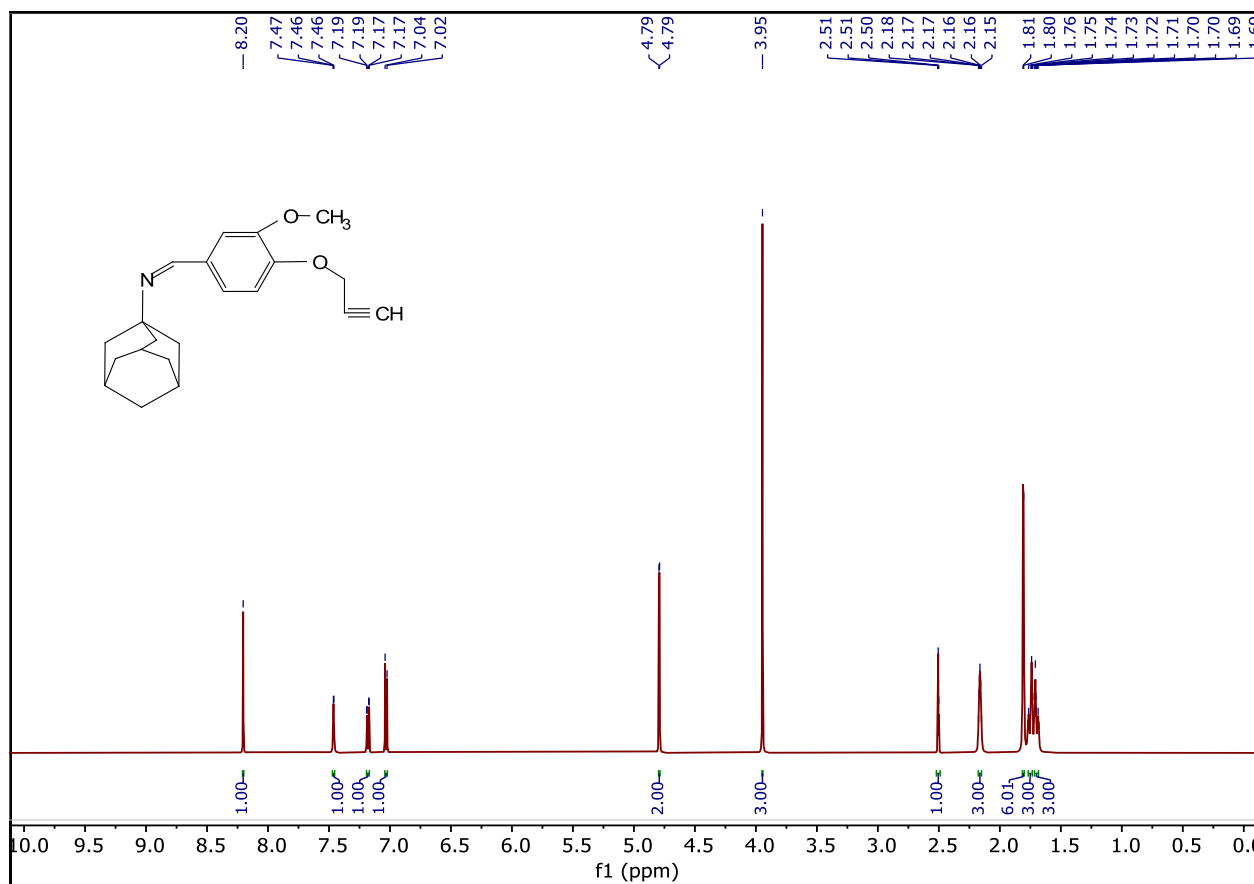

Fig.S2: <sup>1</sup>H NMR spectrum of compound 3b

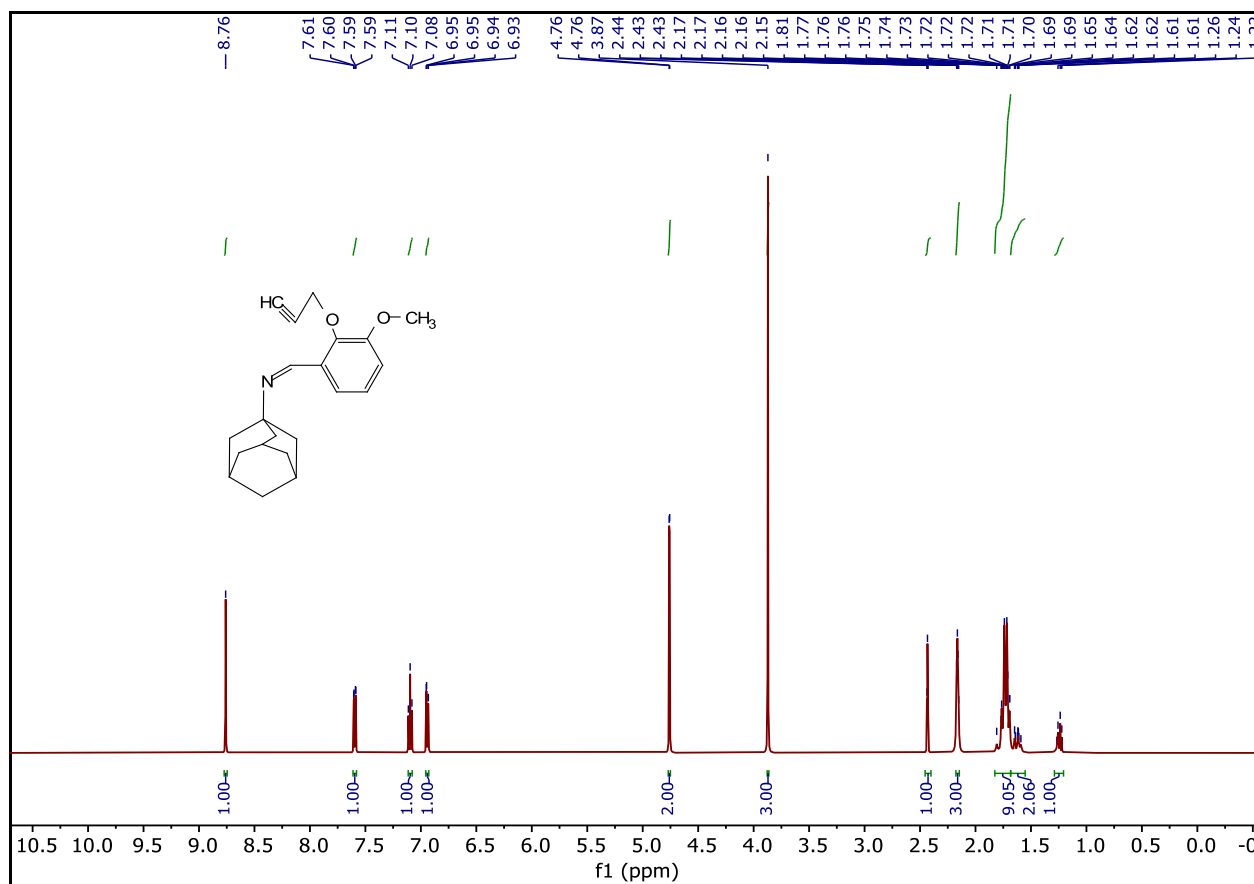

Fig.S3:  $^1\text{H}$  NMR spectrum of compound 3c

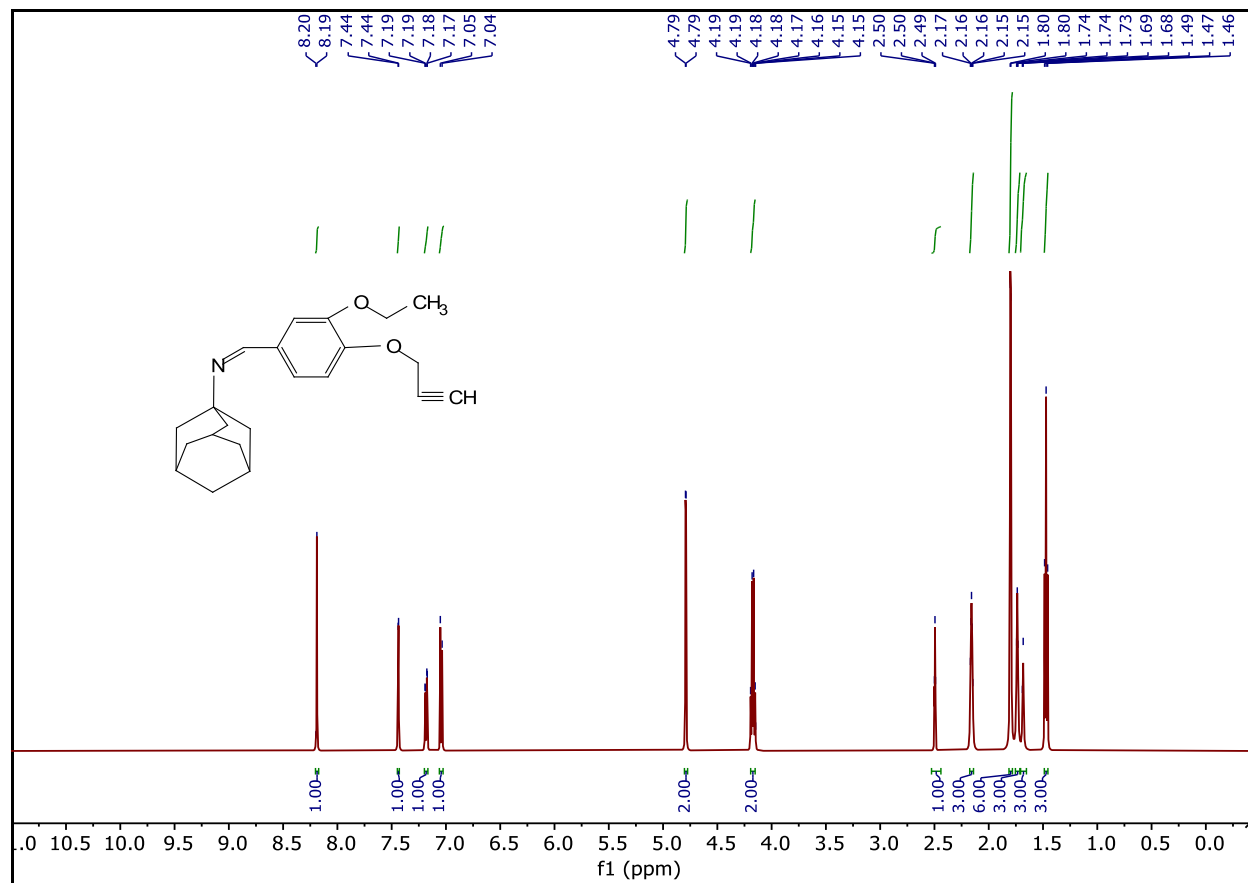

**Fig.S4:** <sup>1</sup>H NMR spectrum of compound 3d

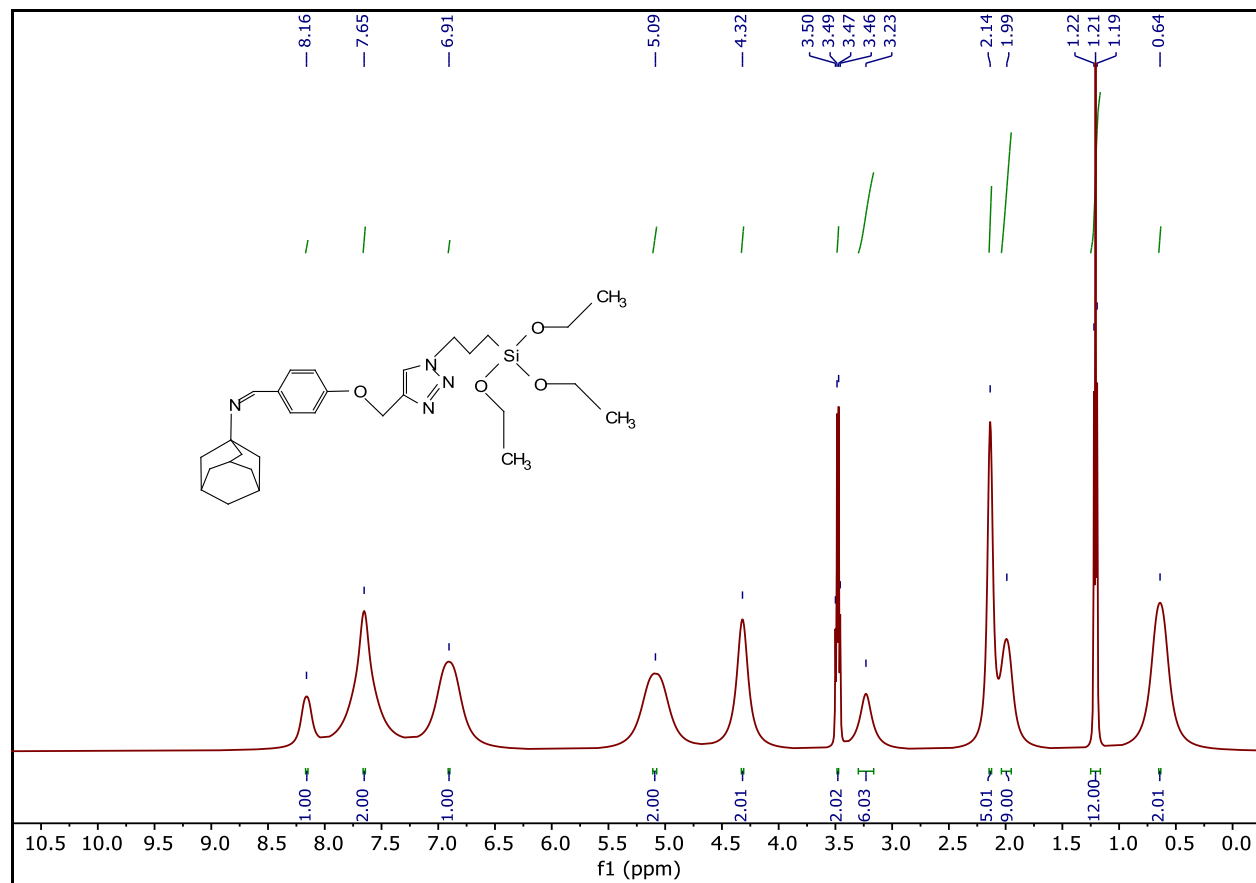

**Fig.S5:**  $^1\text{H}$  NMR spectrum of compound 4a



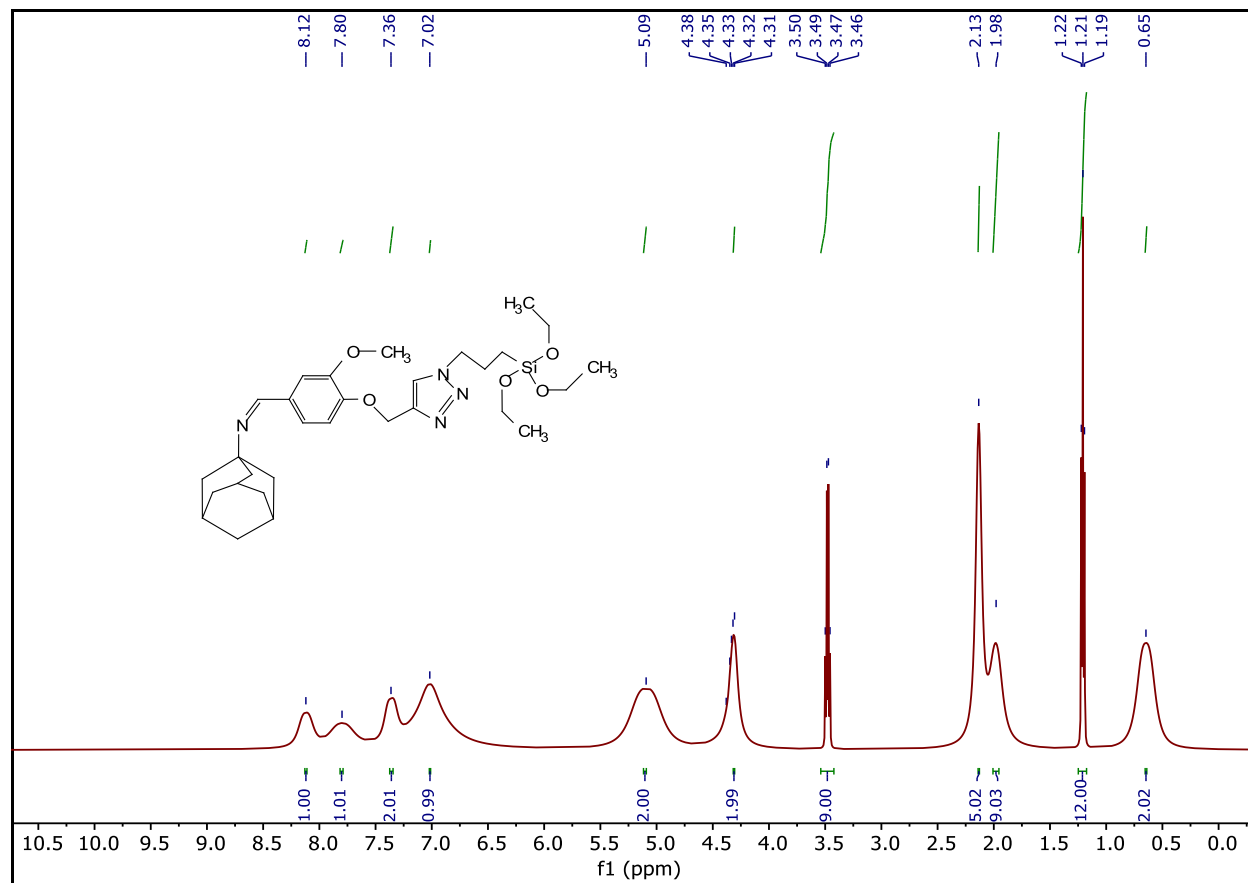

**Fig.S6:**  $^1\text{H}$  NMR spectrum of compound 4b

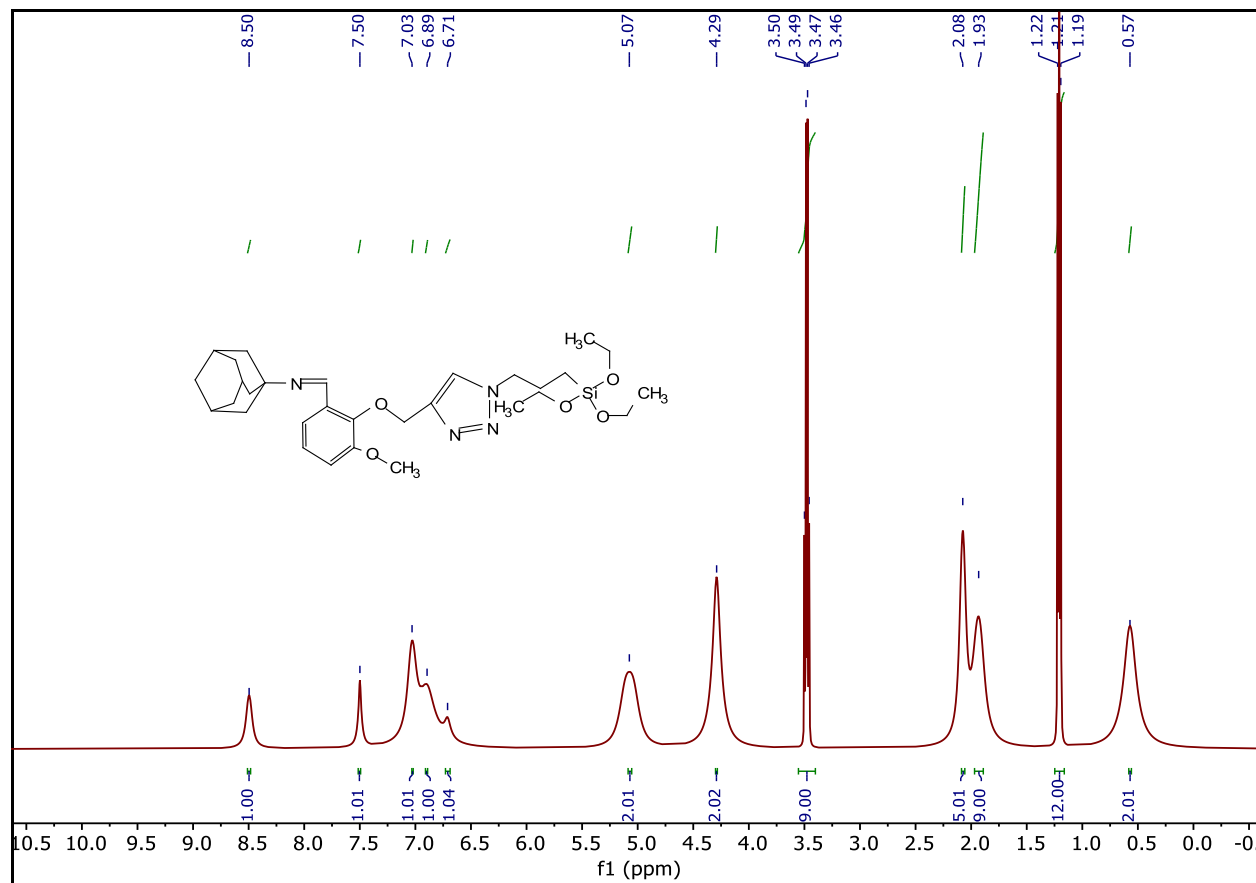

**Fig.S7:** <sup>1</sup>H NMR spectrum of compound 4c

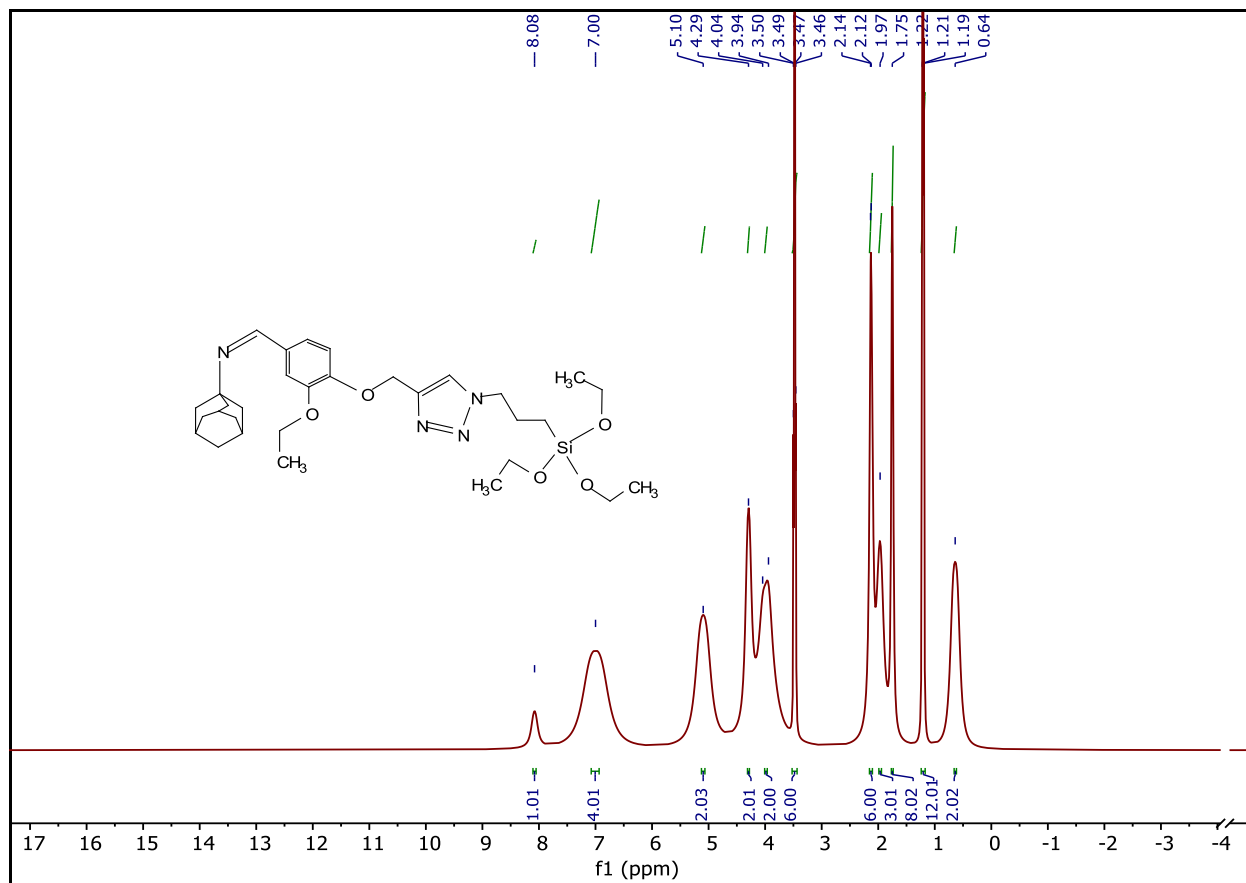

**Fig.S8:** <sup>1</sup>H NMR spectrum of compound 4d

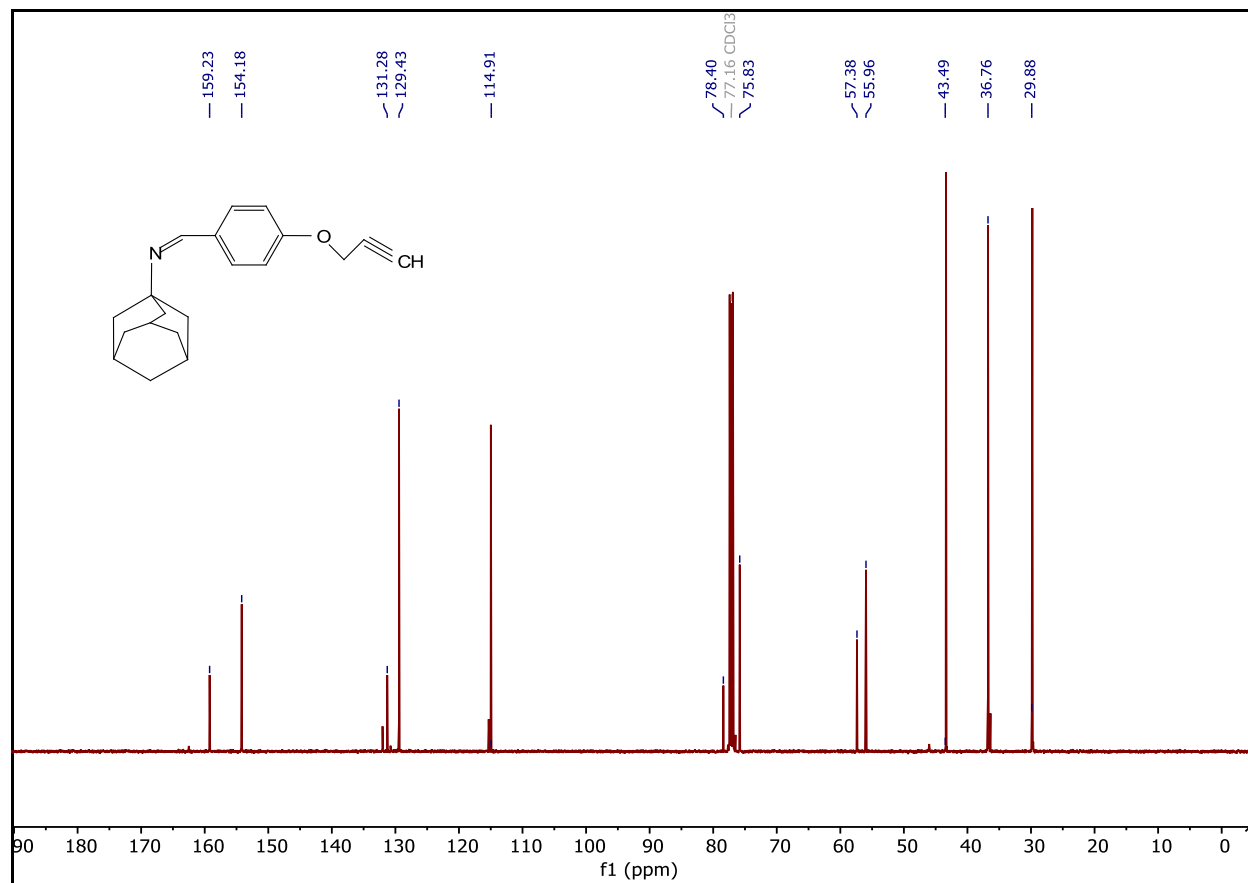

**Fig.S9:** <sup>13</sup>C NMR spectrum of compound 3a

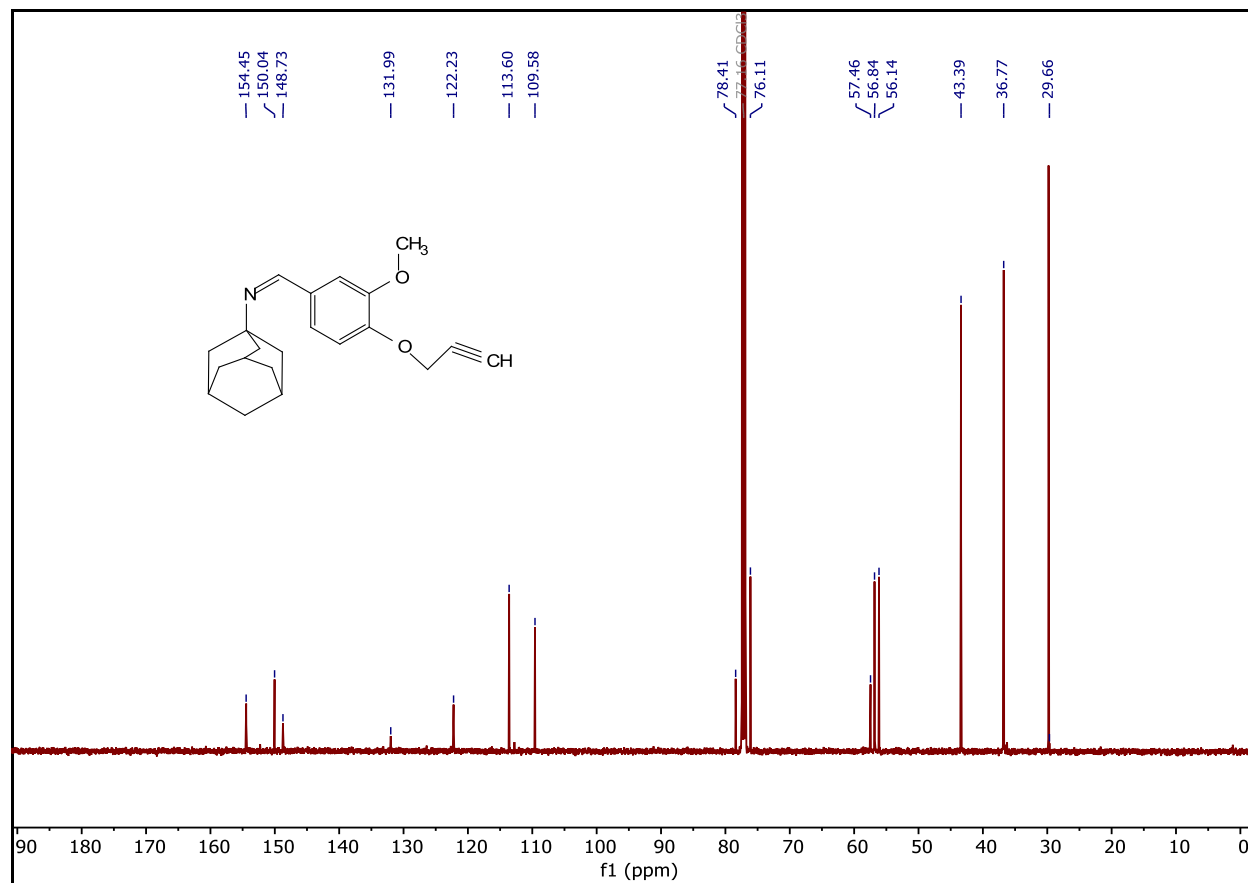

**Fig.S10:**  $^{13}\text{C}$  NMR spectrum of compound 3b

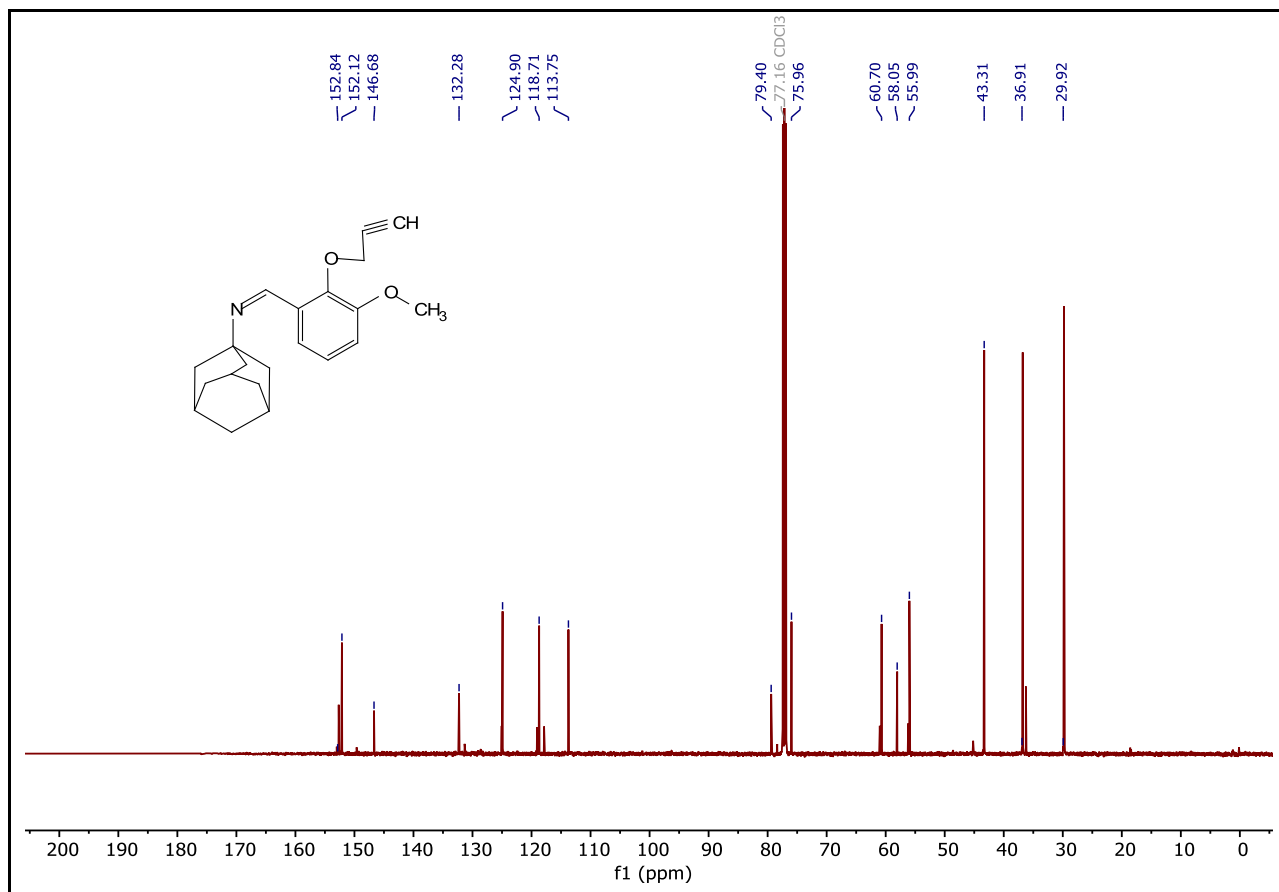

Fig.S11:  $^{13}\text{C}$  NMR spectrum of compound 3c

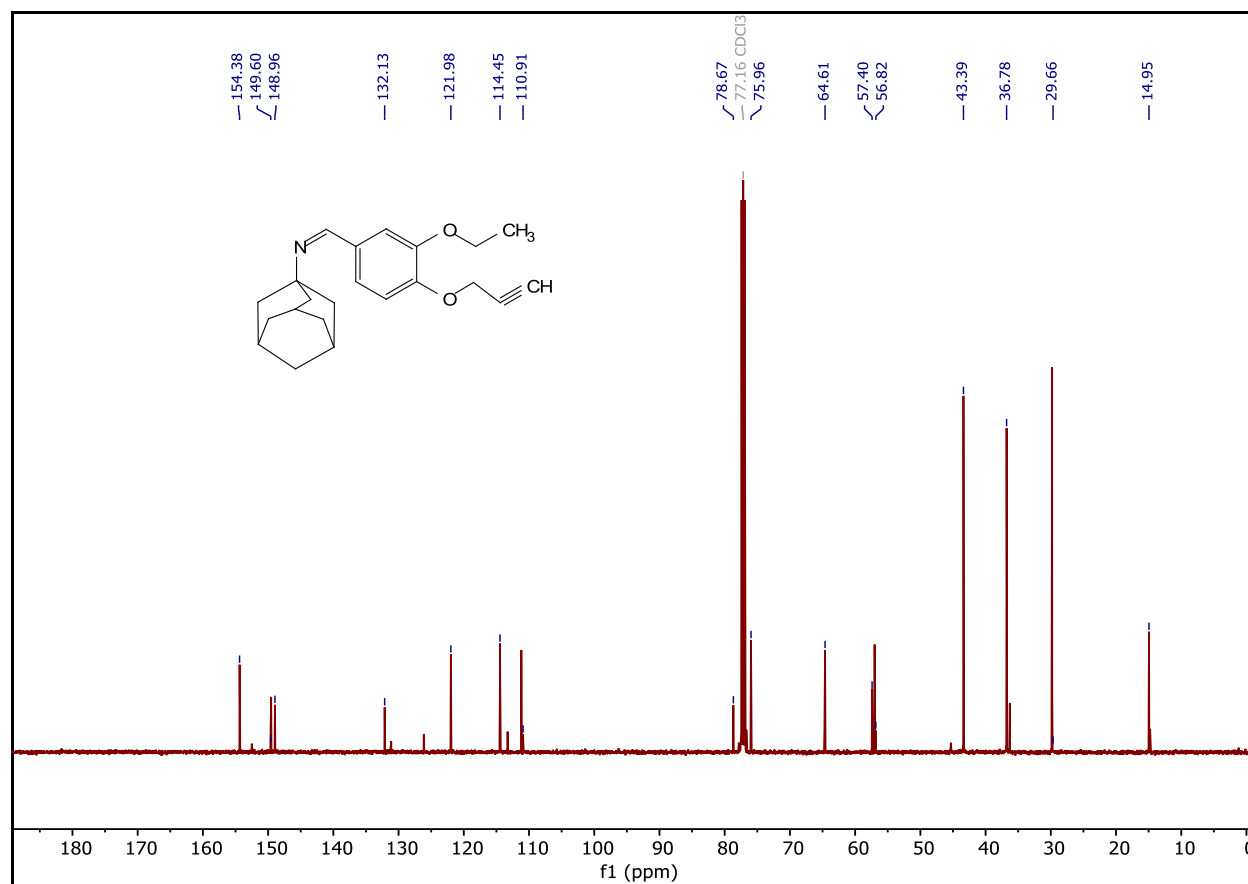

Fig.S12:  $^{13}\text{C}$  NMR spectrum of compound 3d

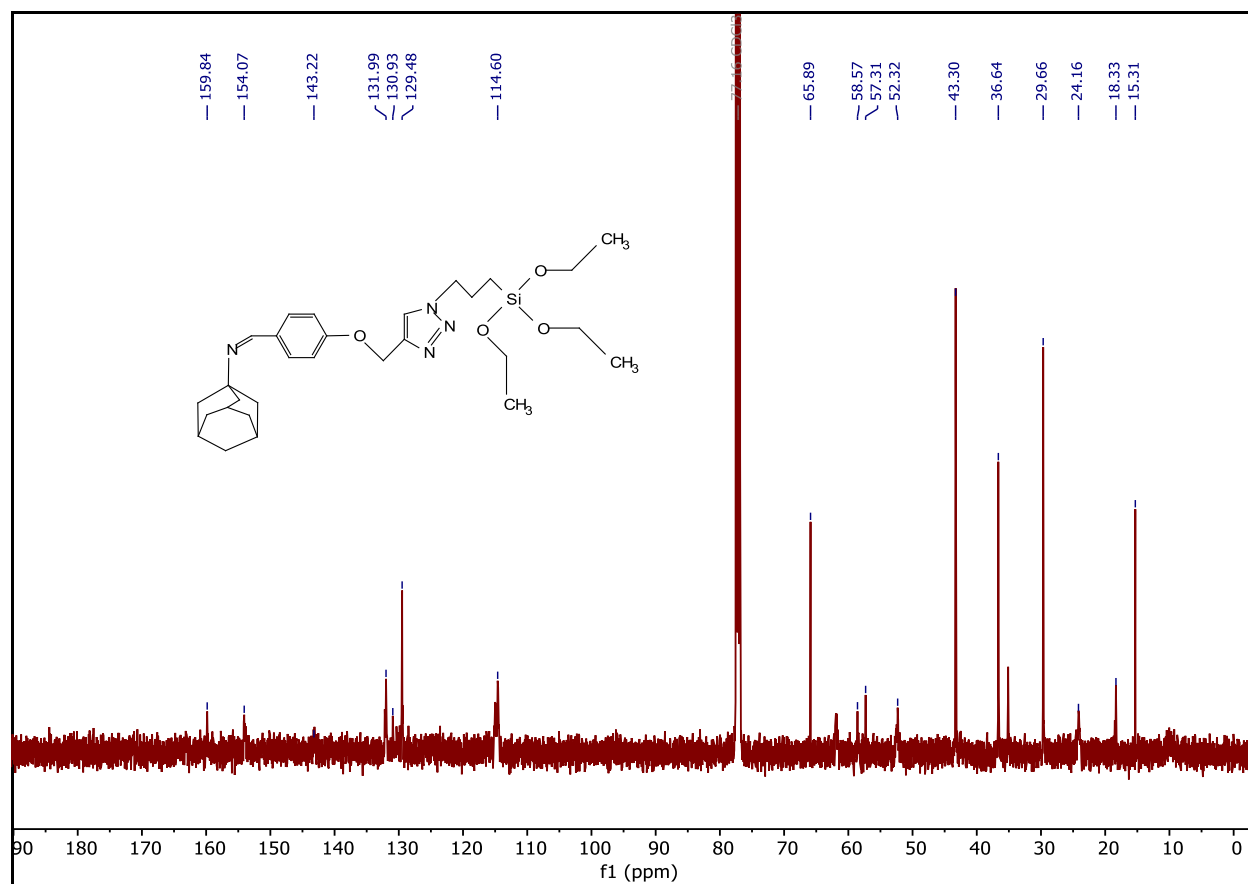

**Fig.S13:** <sup>13</sup>C NMR spectrum of compound 4a



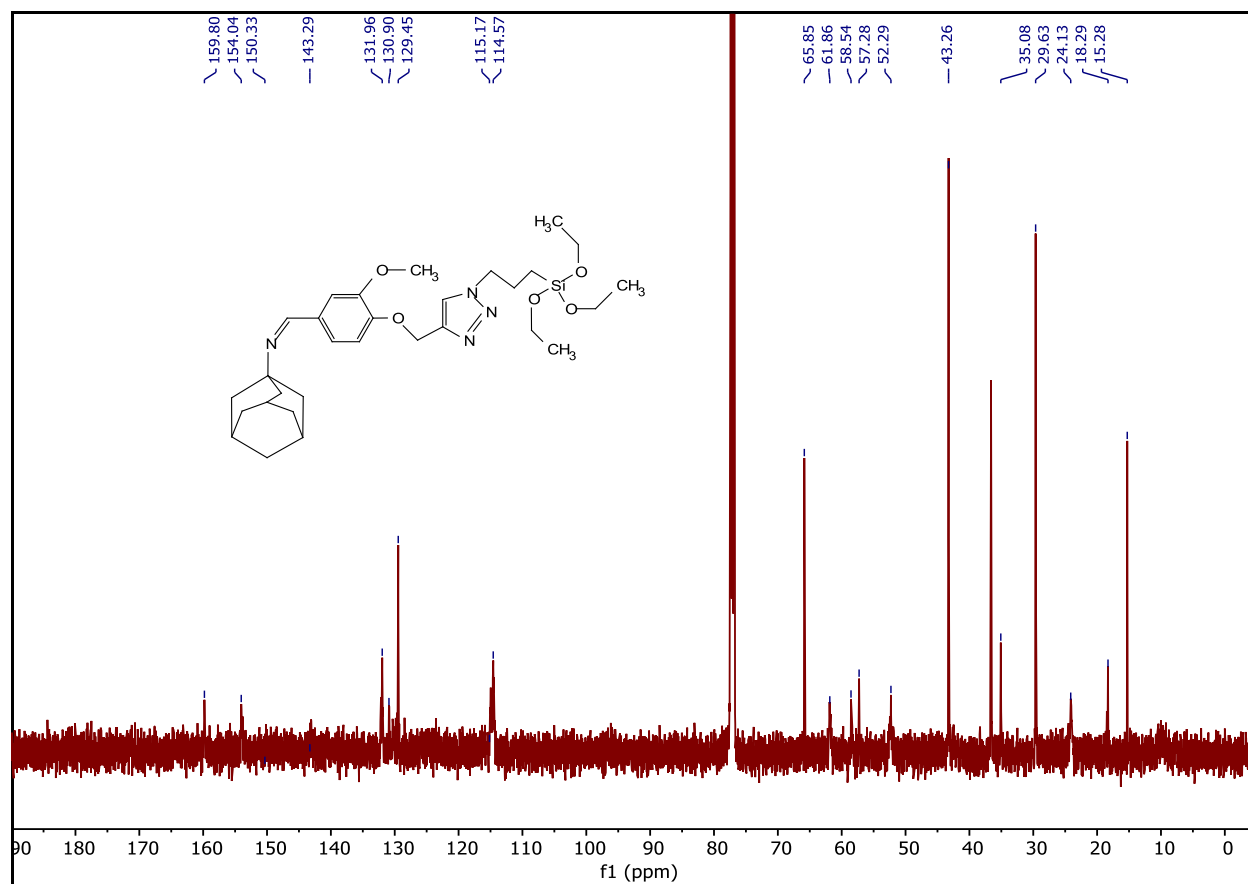

**Fig.S14:** <sup>13</sup>C NMR spectrum of compound 4b

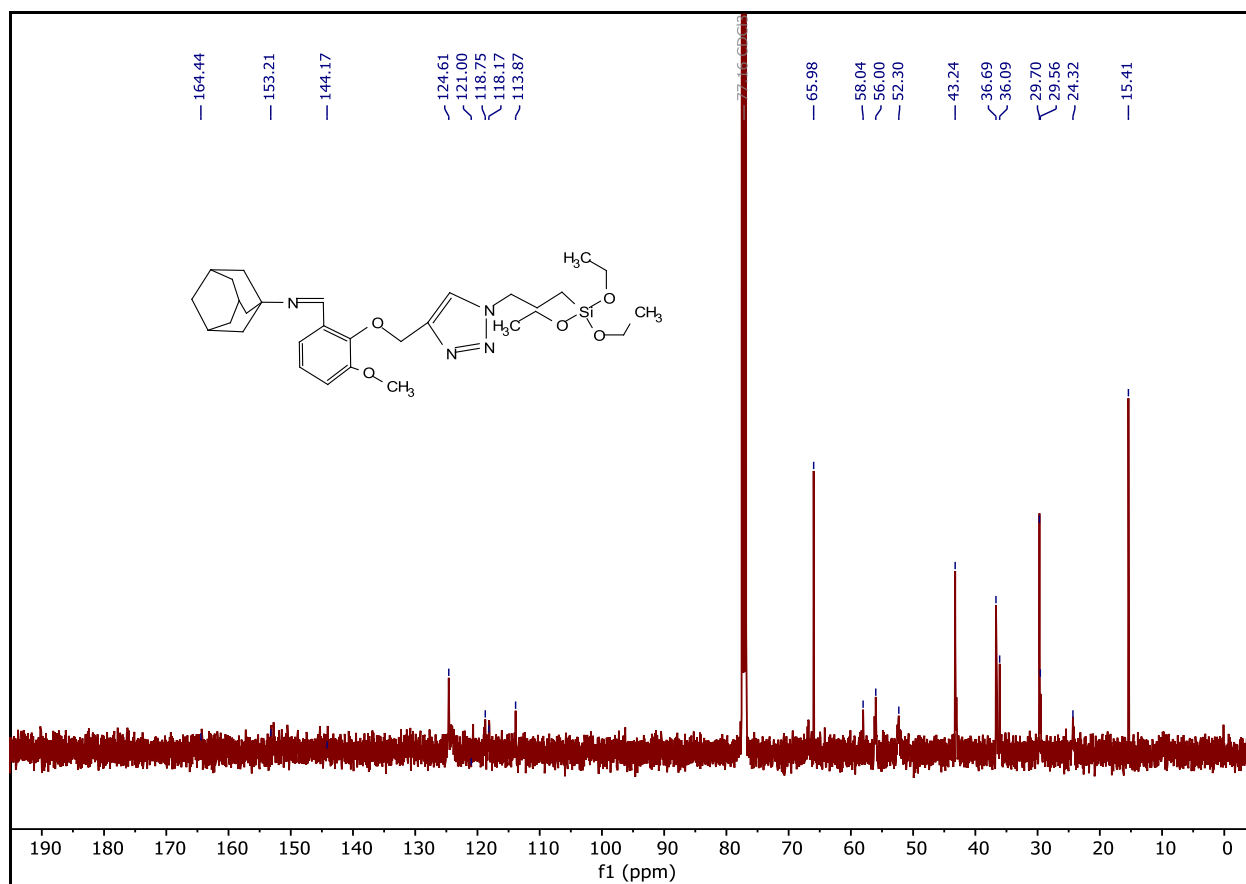

**Fig.S15:** <sup>13</sup>C NMR spectrum of compound 4c

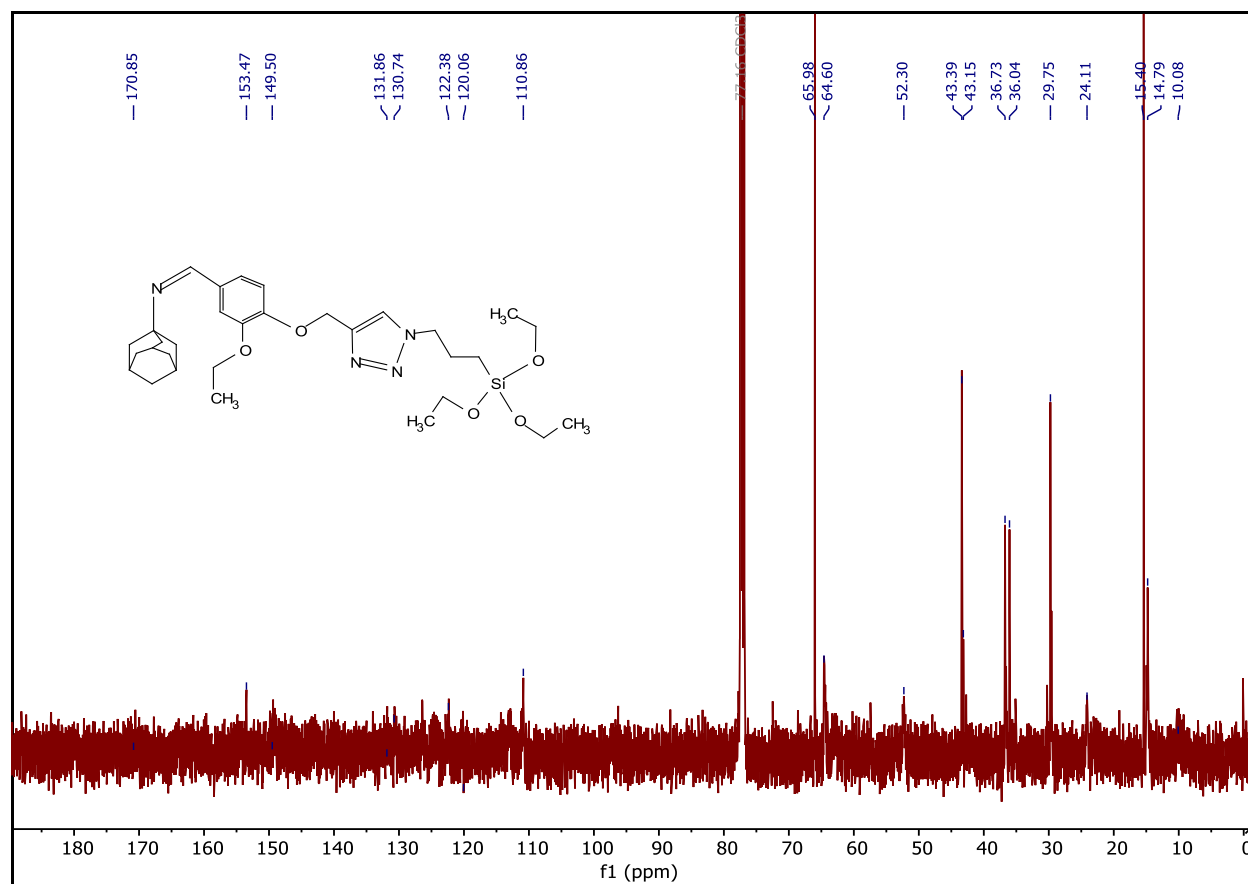

**Fig.S16:**  $^{13}\text{C}$  NMR spectrum of compound 4d

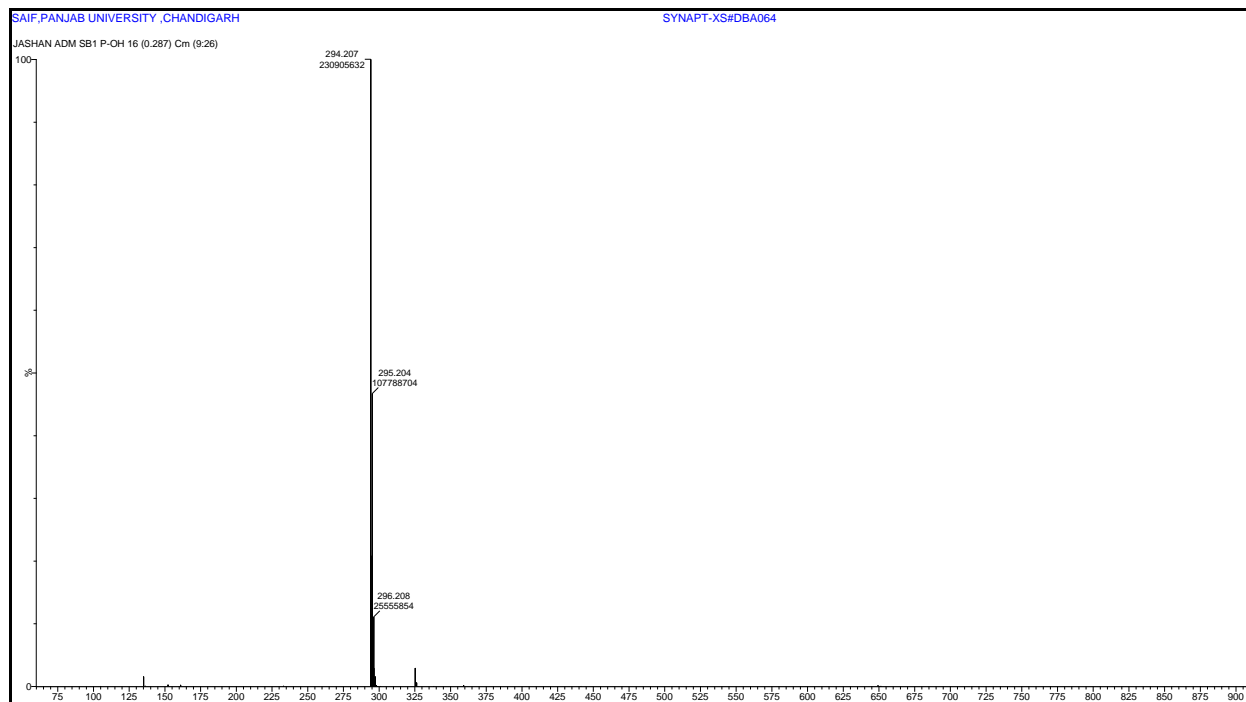

**Fig.S17:** Mass spectrum of compound 3a

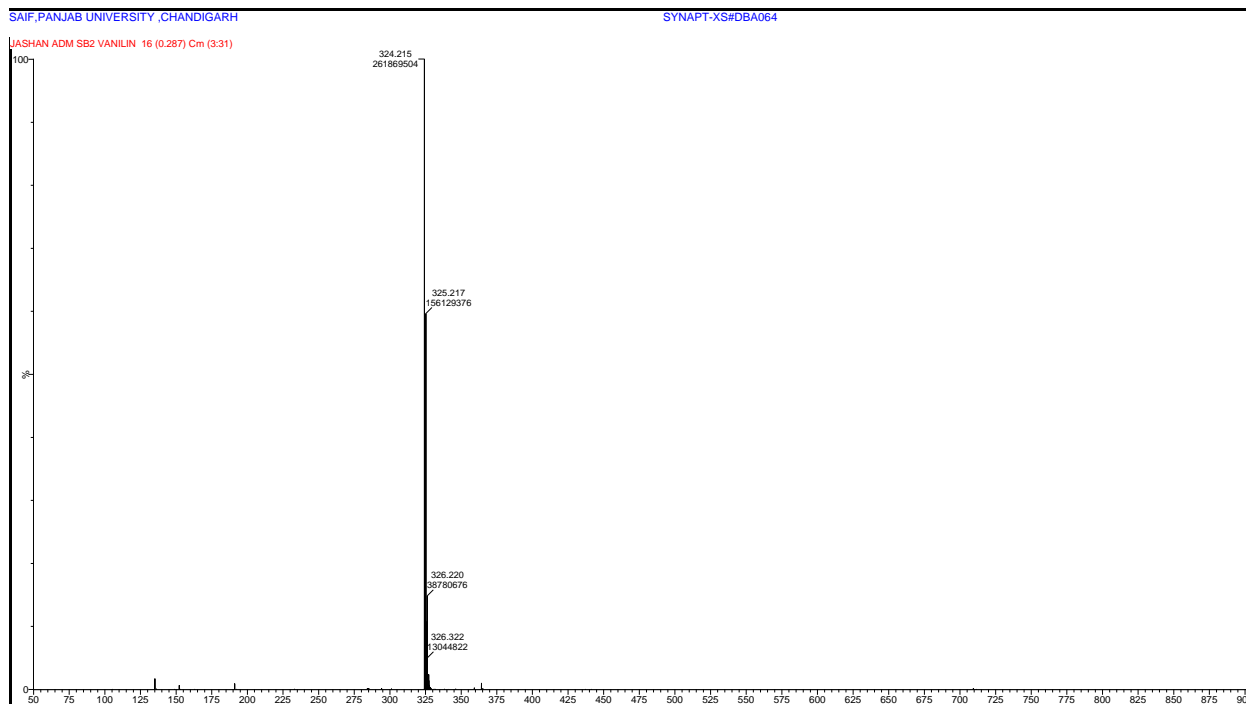

**Fig.S18:** Mass spectrum of compound 3b

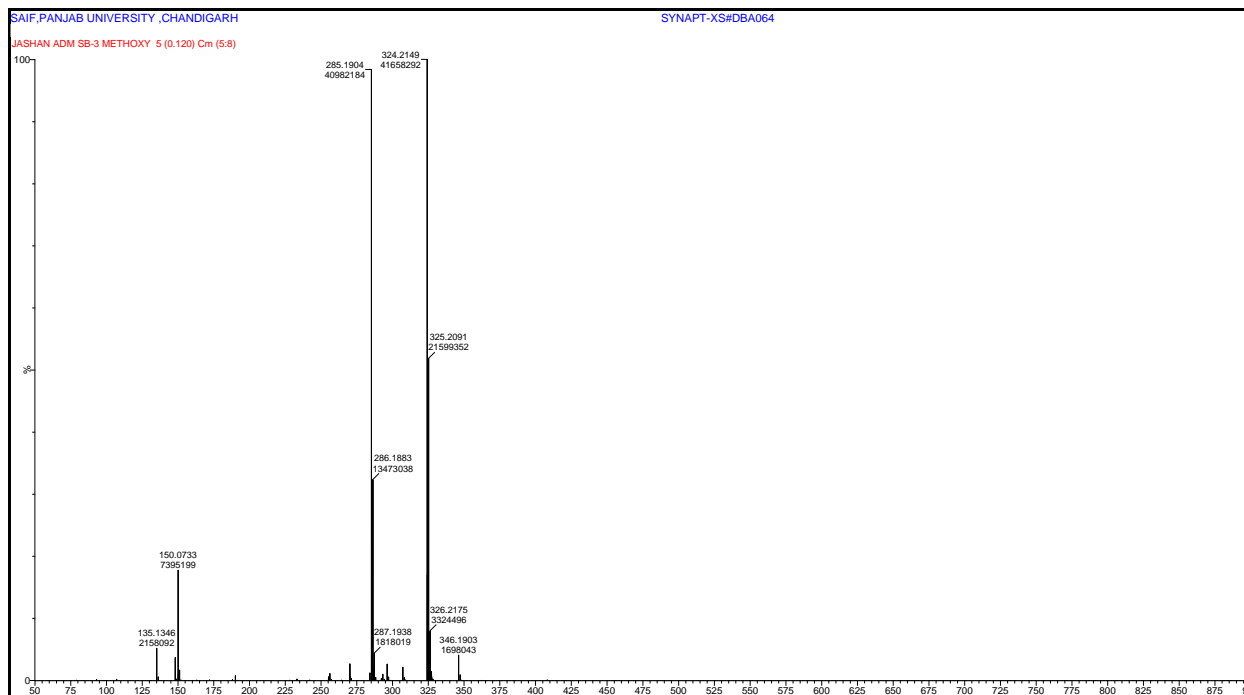

Fig.S19: Mass spectrum of compound 3c

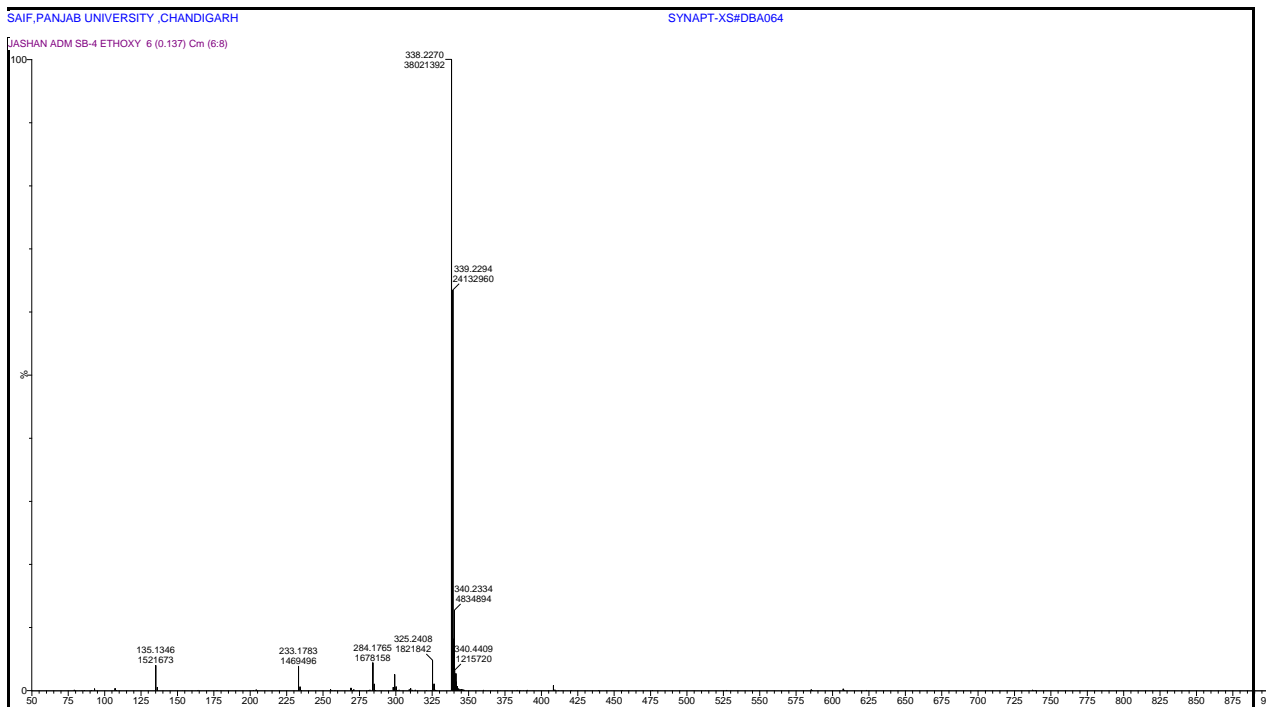

Fig.S20: Mass spectrum of compound 3d

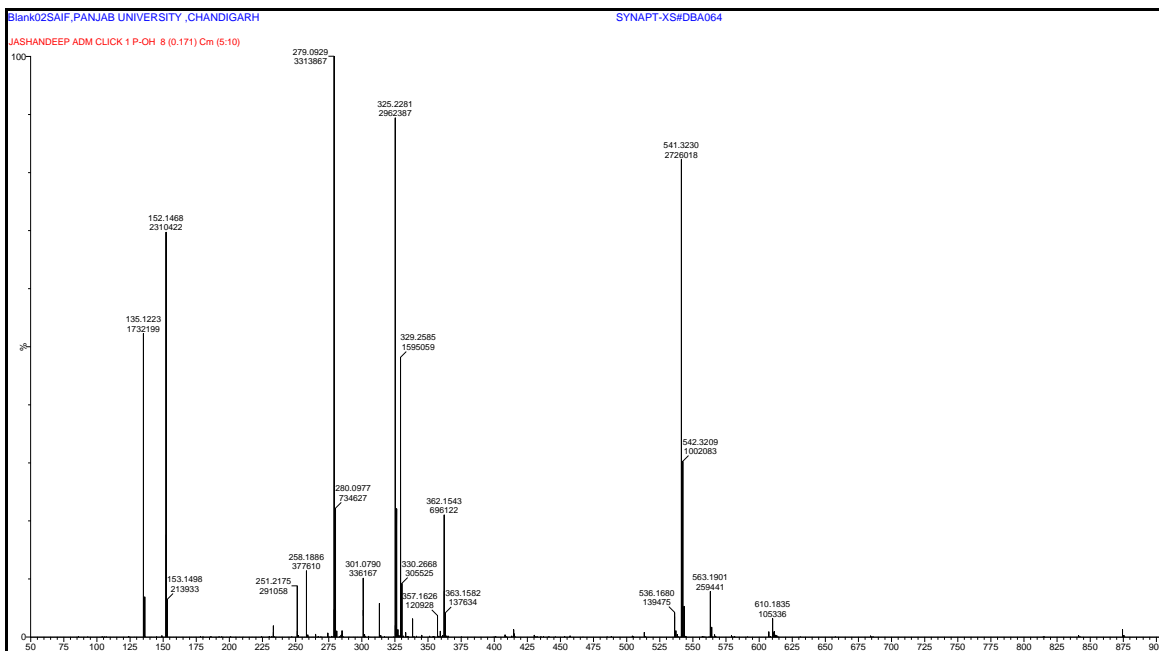

Fig.S21: Mass spectrum of compound 4a

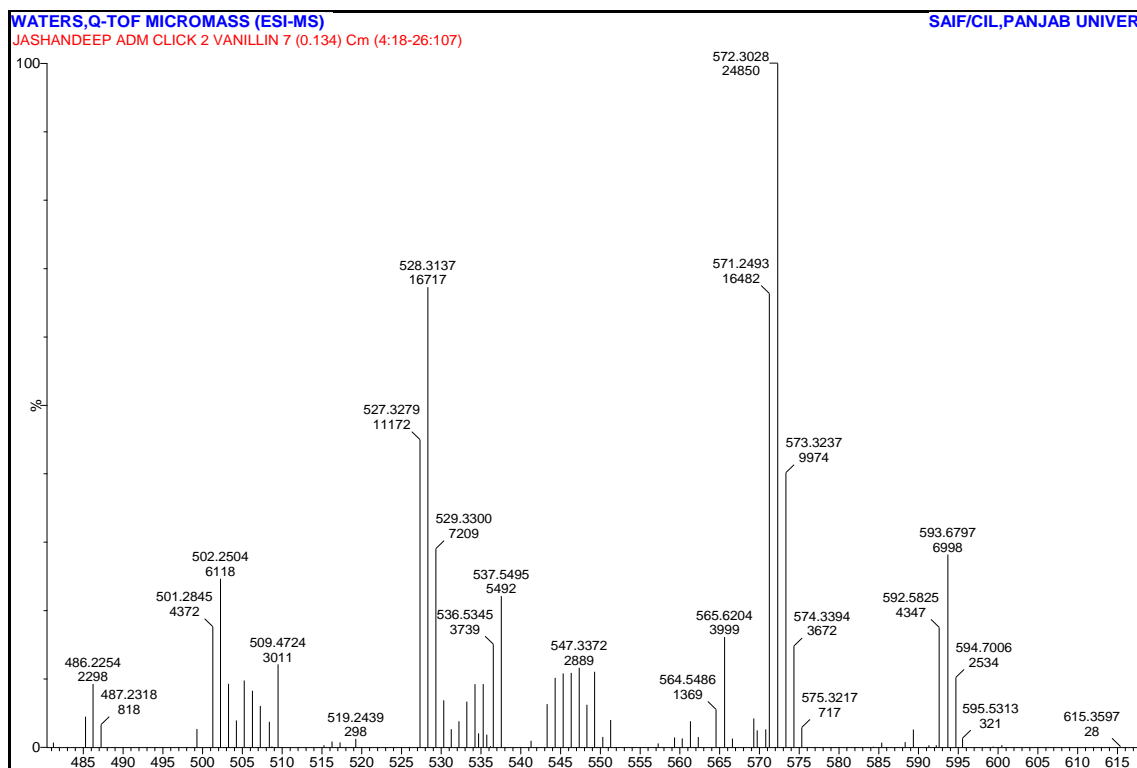

Fig.S22: Mass spectrum of compound 4b

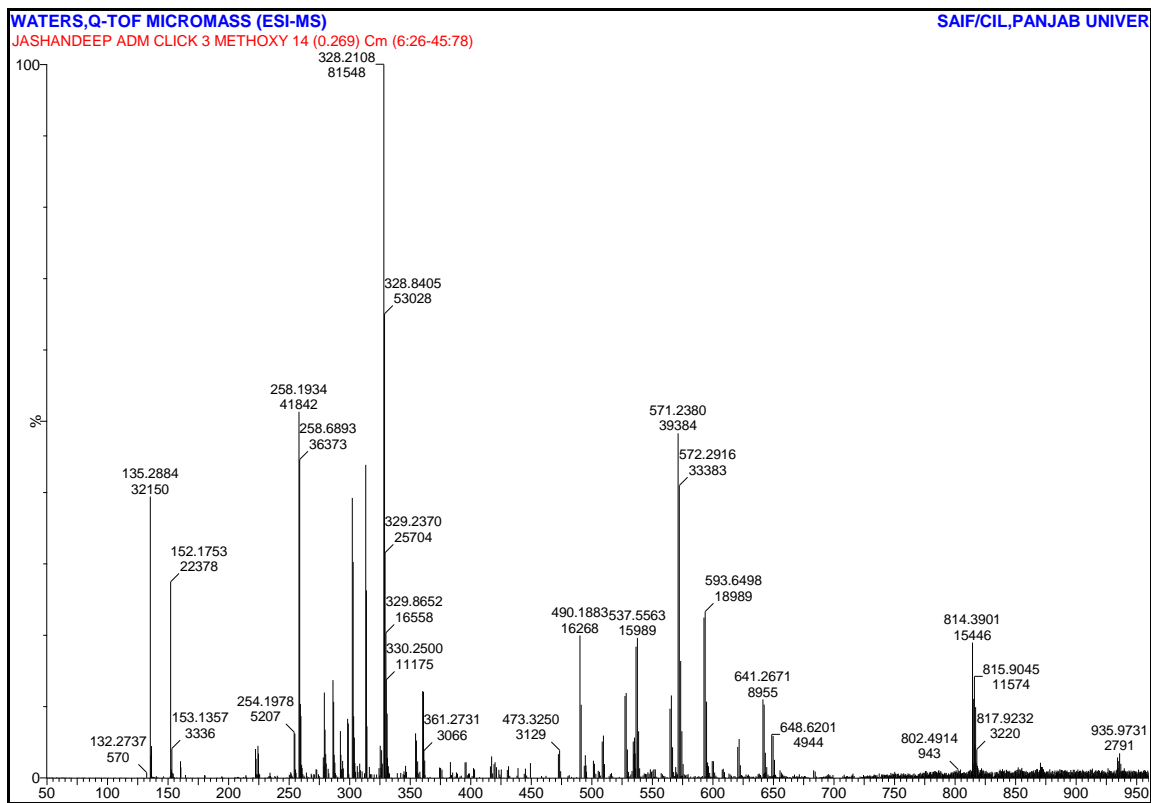

Fig.S23: Mass spectrum of compound 4c

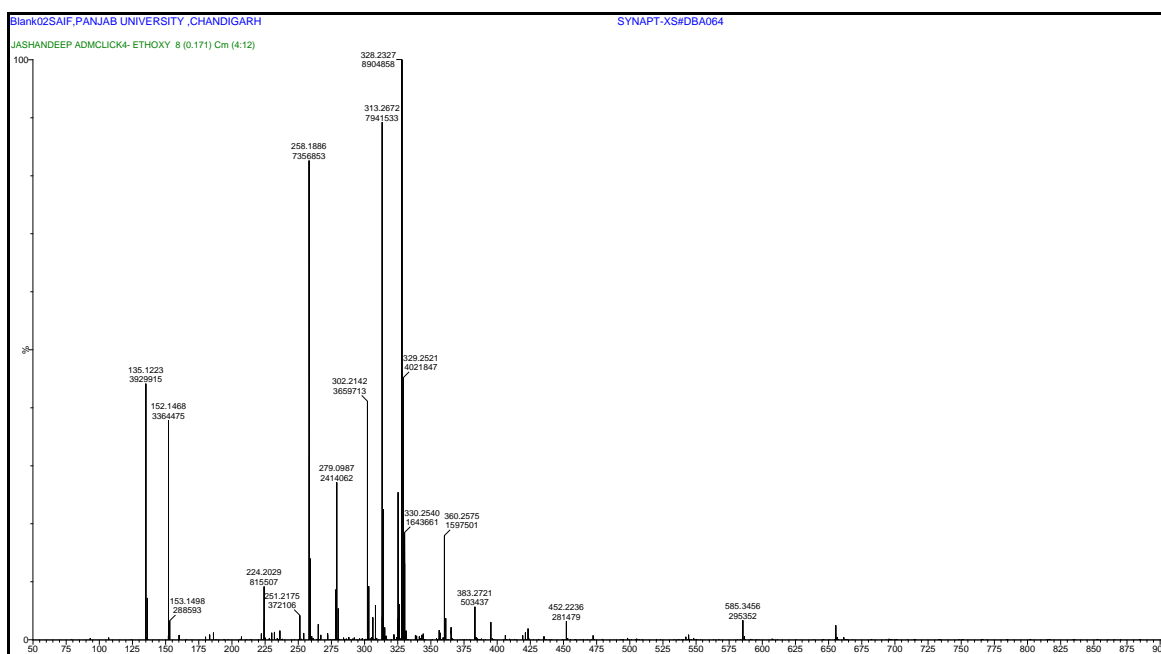

Fig.S24: Mass spectrum of compound 4d

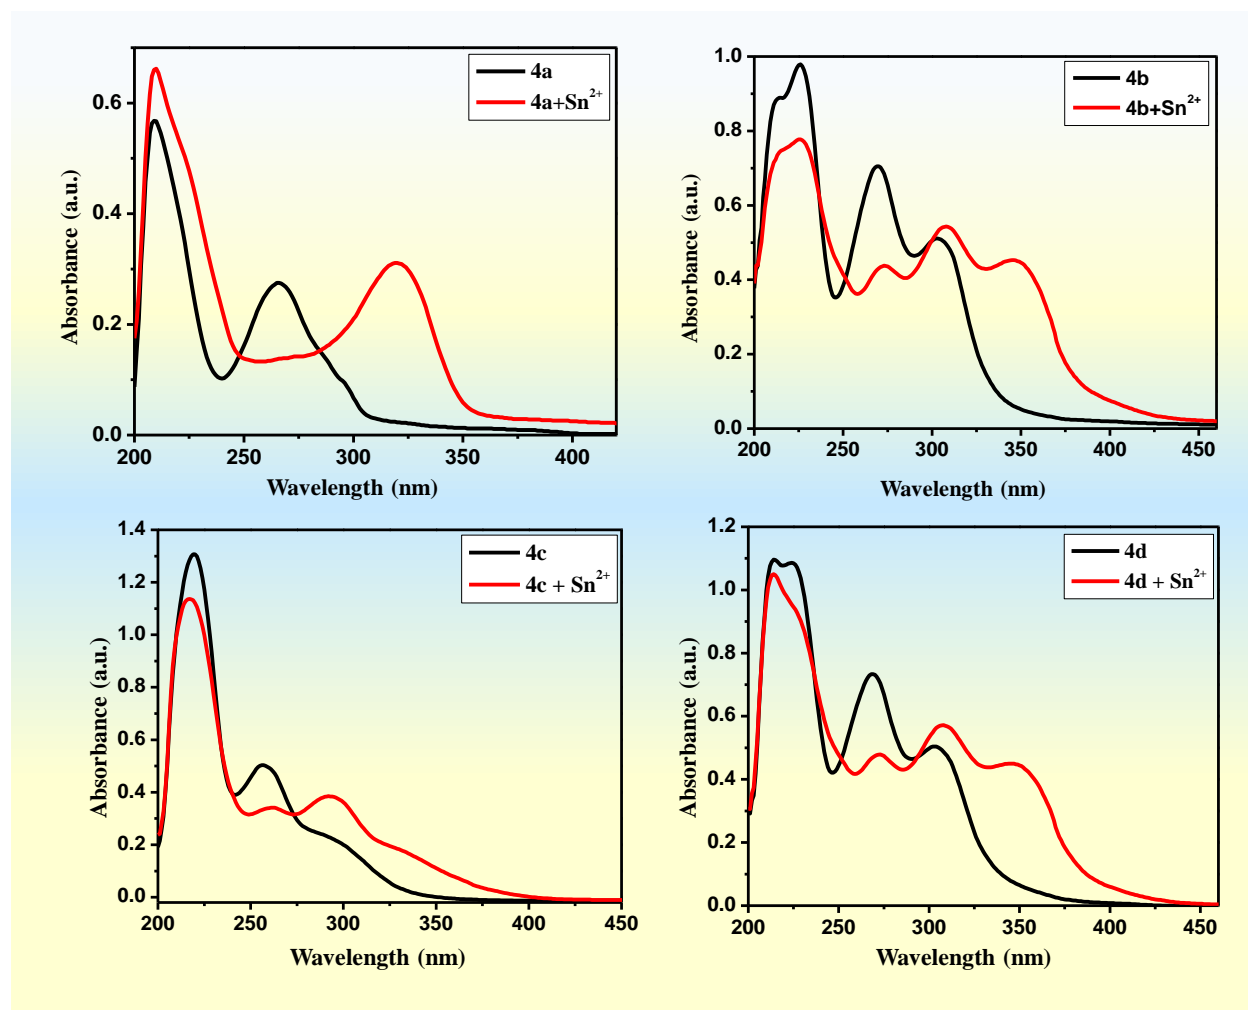

**Fig.S25:** UV-Visible spectra of 4(a-d) in methanol ( $10^{-6}$  M)

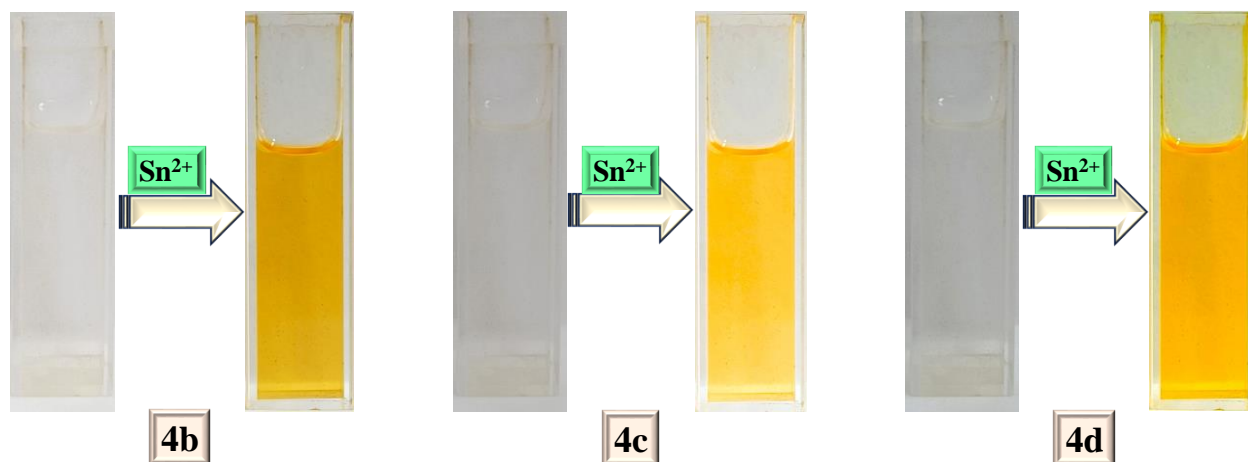

**Fig.S26.** Visual recognition of 4(b-d) in daylight in the presence of  $\text{Sn}^{2+}$  ions in methanol.



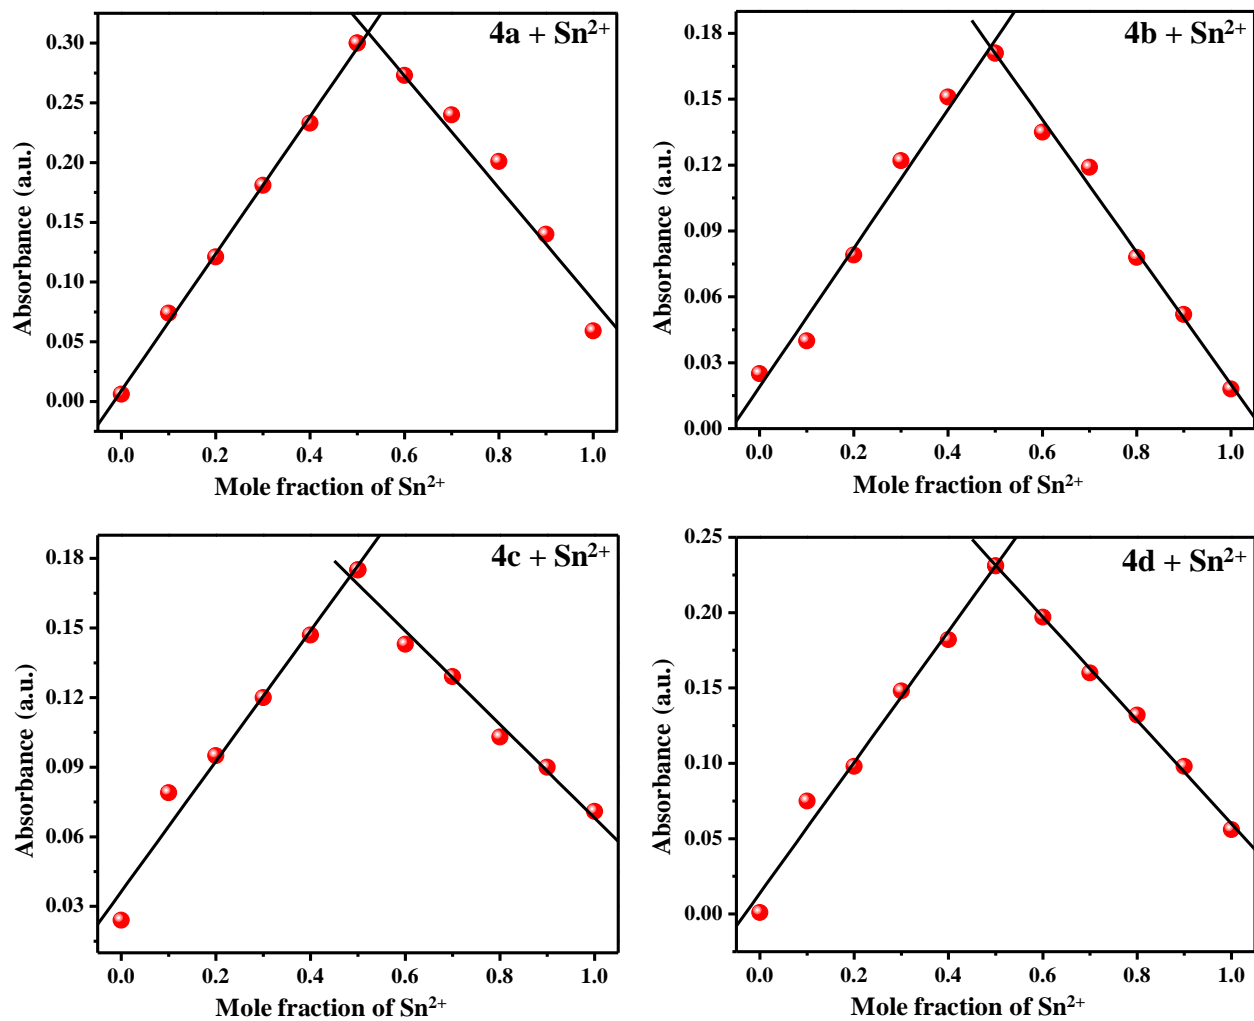

**Fig.S27:** Job's plots for the complexation of 4(a-d) with  $\text{Sn}^{2+}$  ions in methanol showing 1:1 stoichiometry

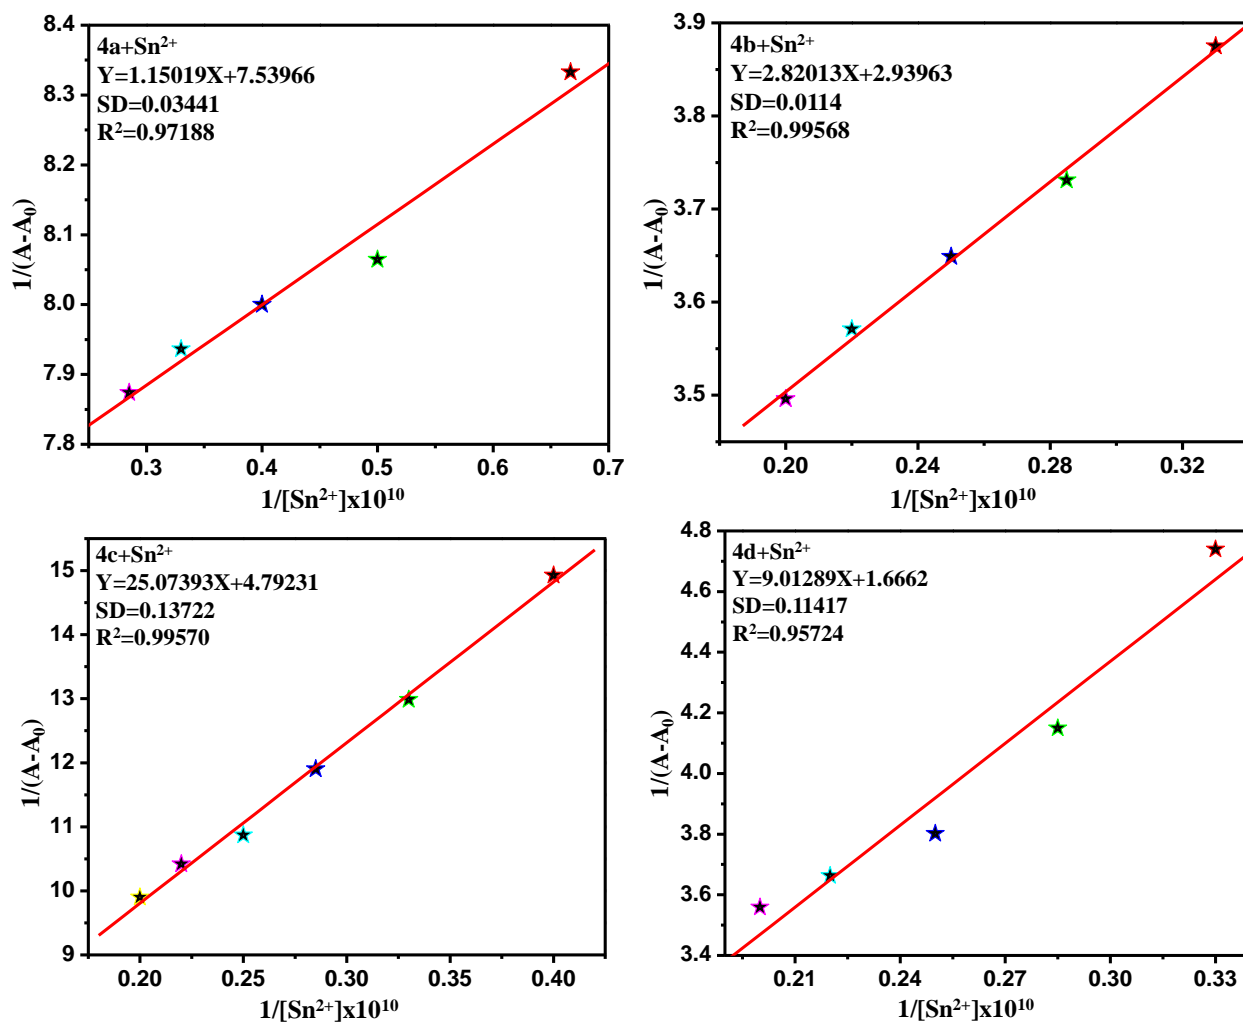

**Fig.S28:** B-H plots for the compounds 4(a-d) with Sn<sup>2+</sup> ions at 270 nm

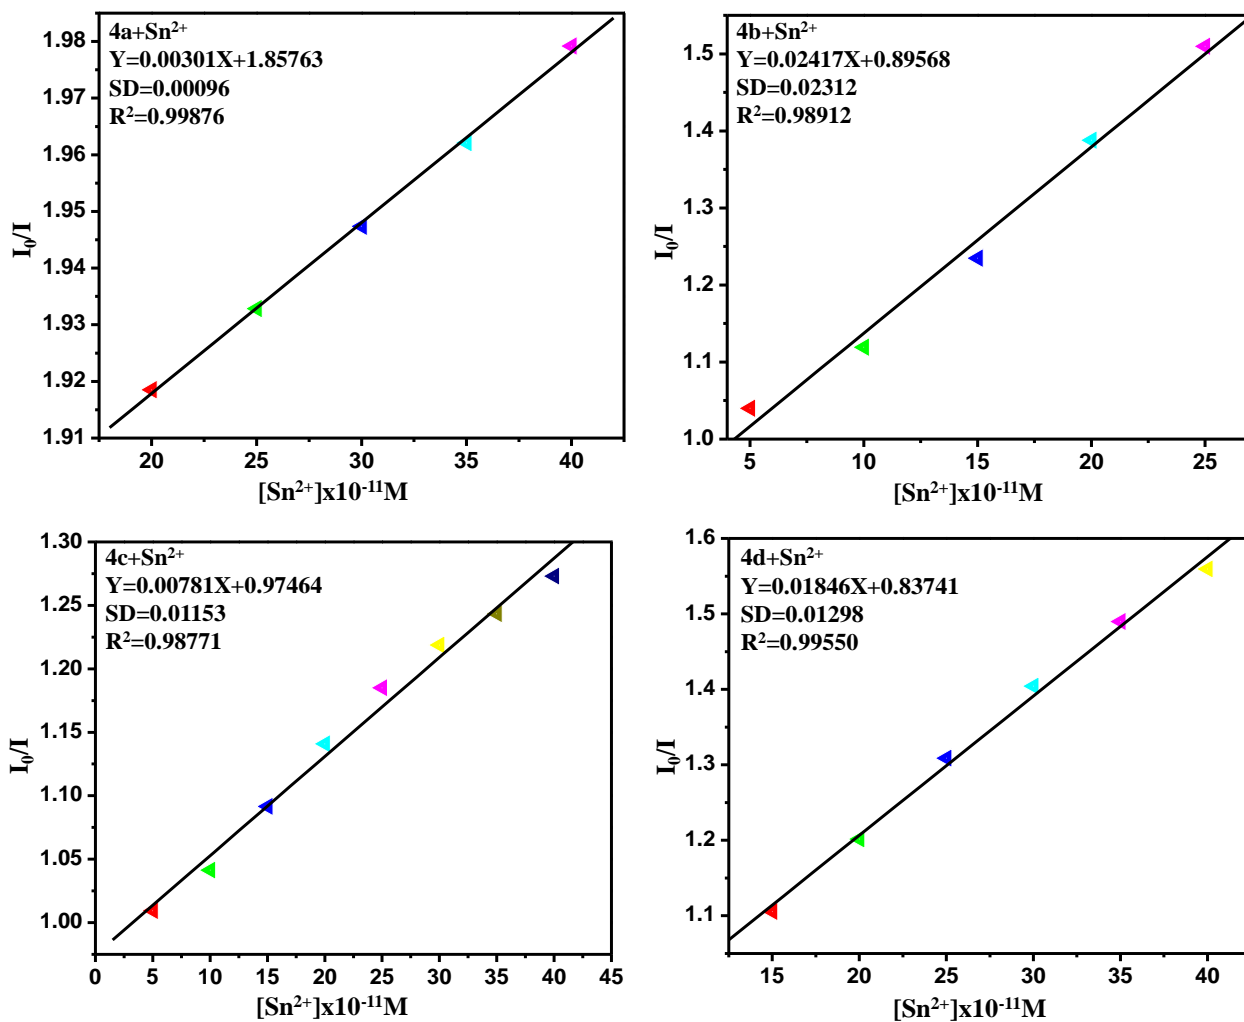

**Fig.S29:** LOD curves for the compounds 4(a-d) with  $\text{Sn}^{2+}$  ions at 270 nm

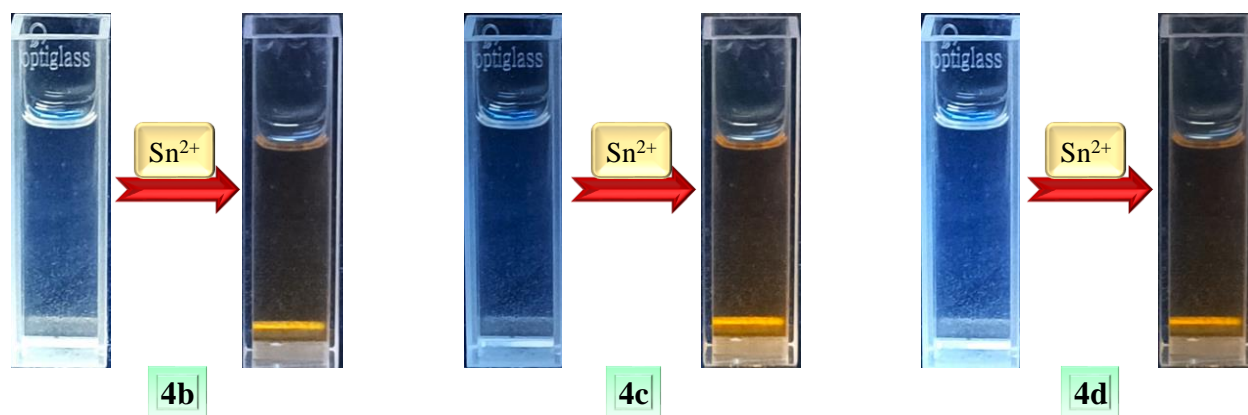

Fig.S30. Fluorescence emission under UV-light of 4(b-d) in the presence of  $\text{Sn}^{2+}$  ions in methanol.

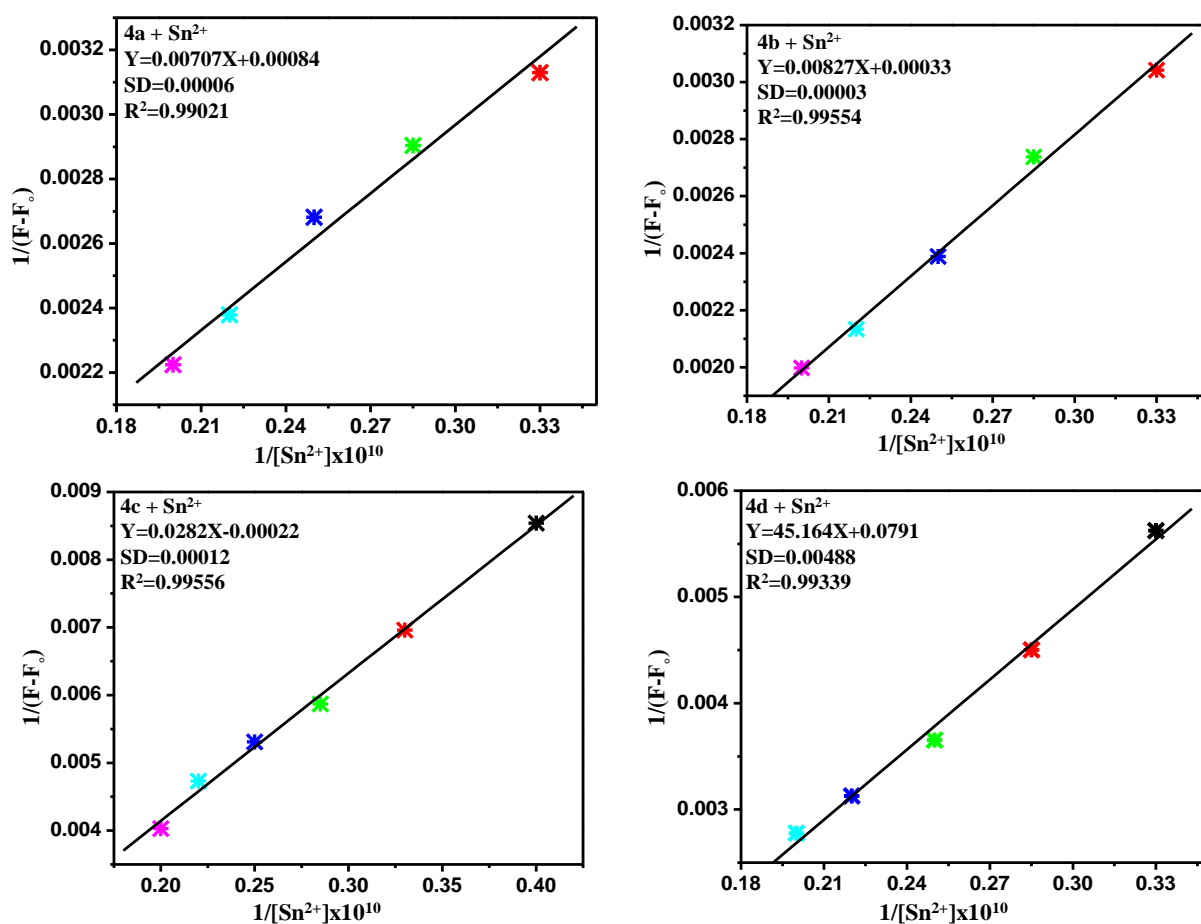

Fig.S31: Benesi-Hildebrand plots for the compounds 4(a-d) at 527 nm

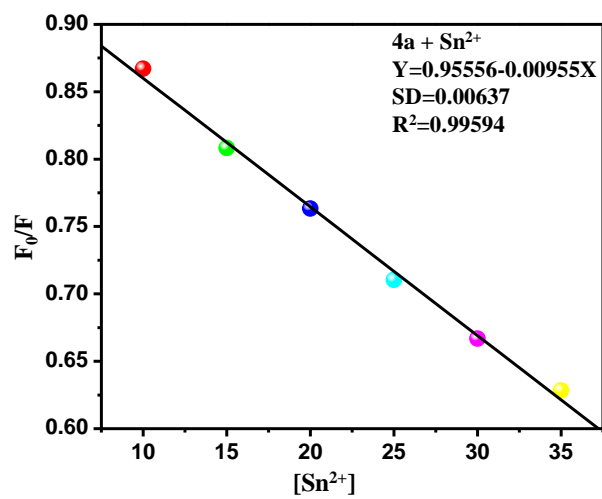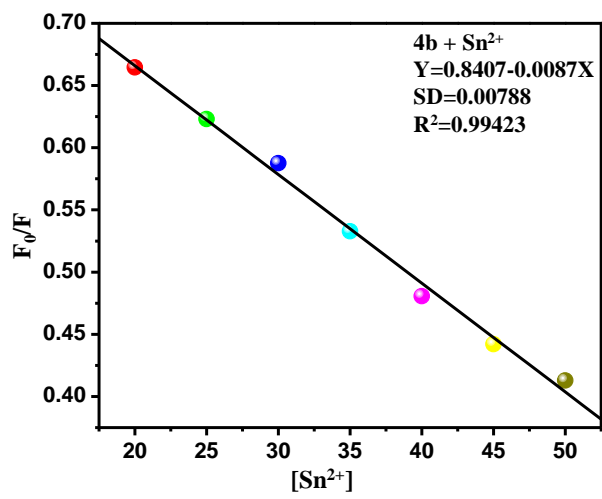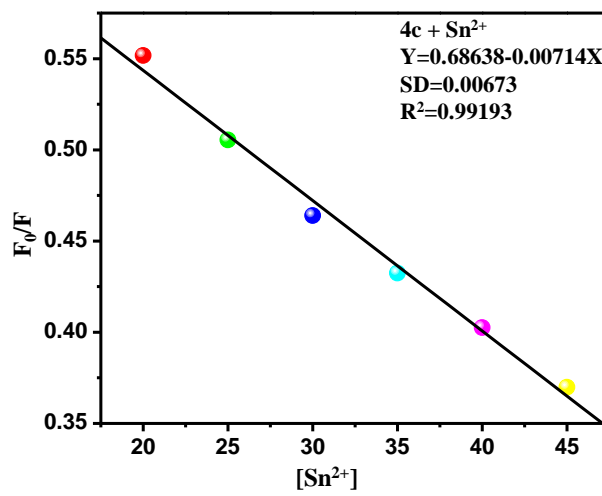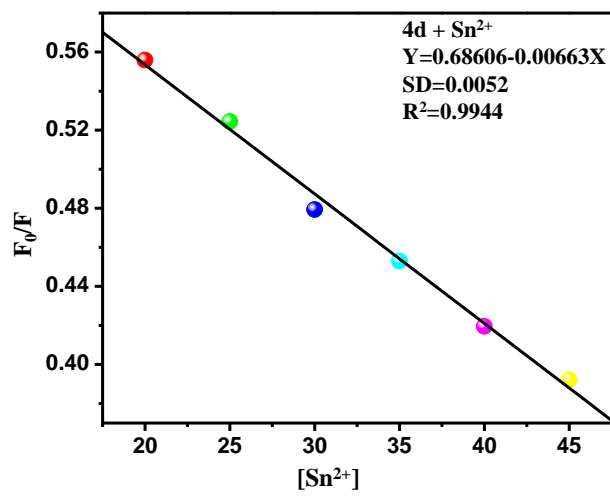

**Fig.S32:** LOD curves for the compounds 4(a-d) with Sn<sup>2+</sup> ions at 527 nm

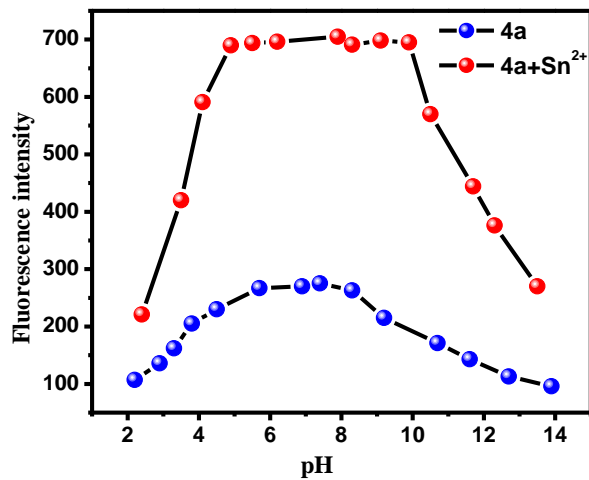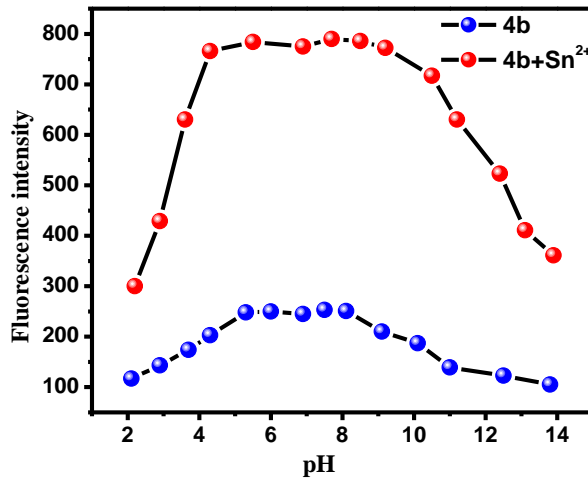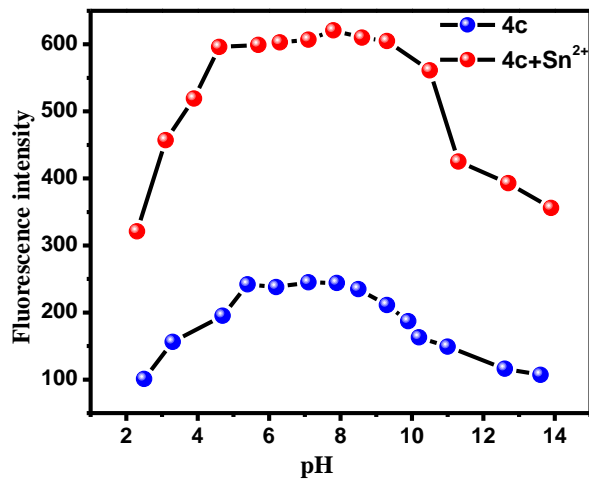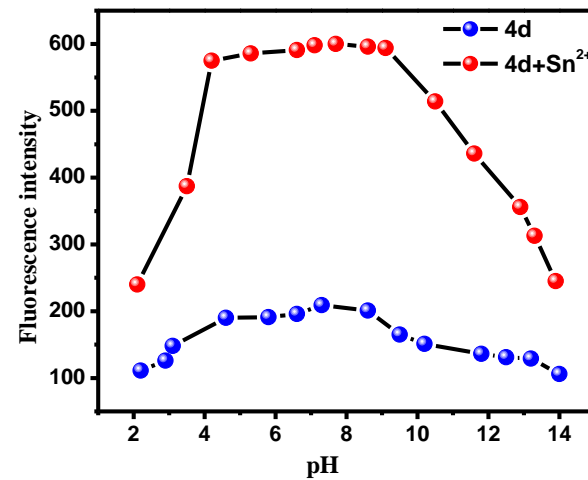

**Fig.S33:** Fluorescence intensity of compounds (4a-4d) in the absence and presence of Sn<sup>2+</sup> ions as functions of pH values at 527 nm.

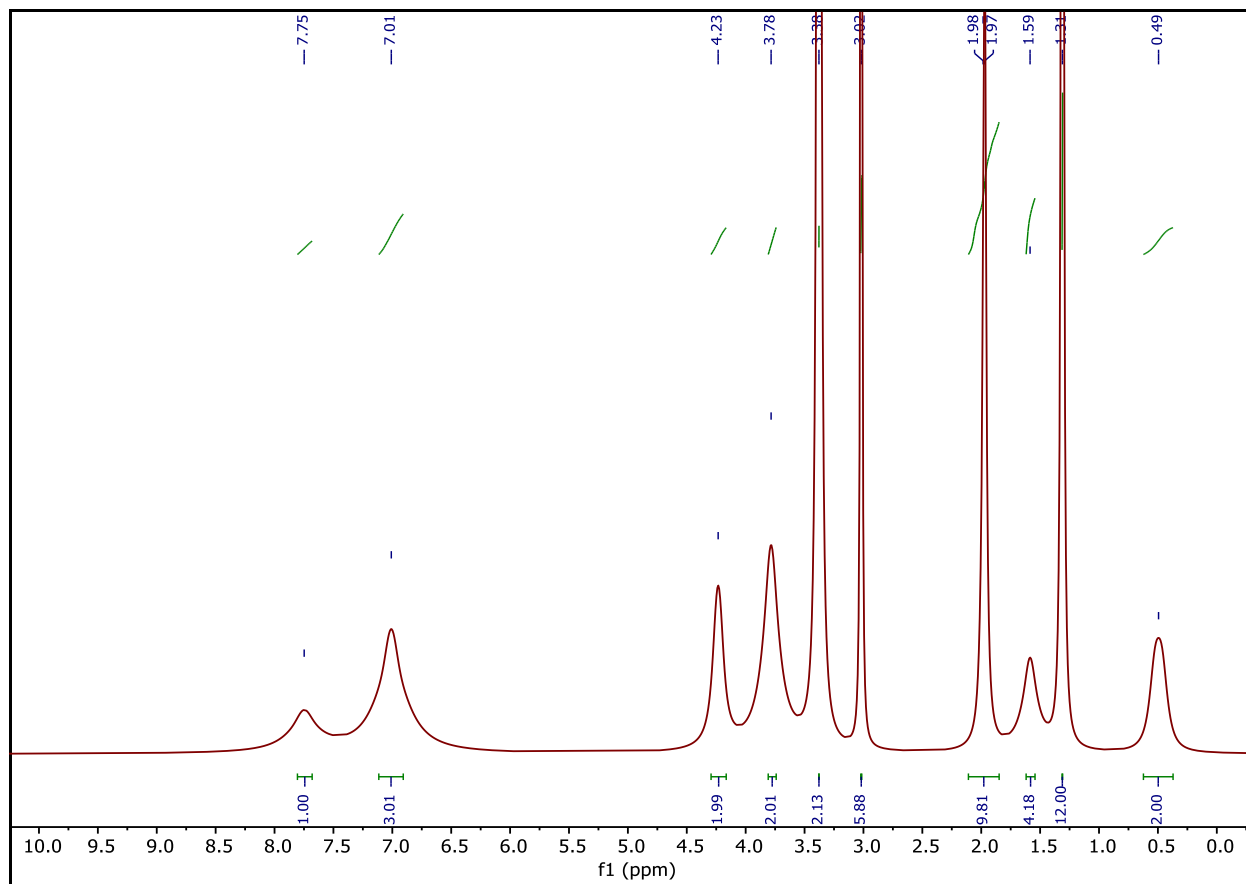

**Fig.S34:**  $^1\text{H}$  NMR spectrum of compound 4a-Sn $^{2+}$

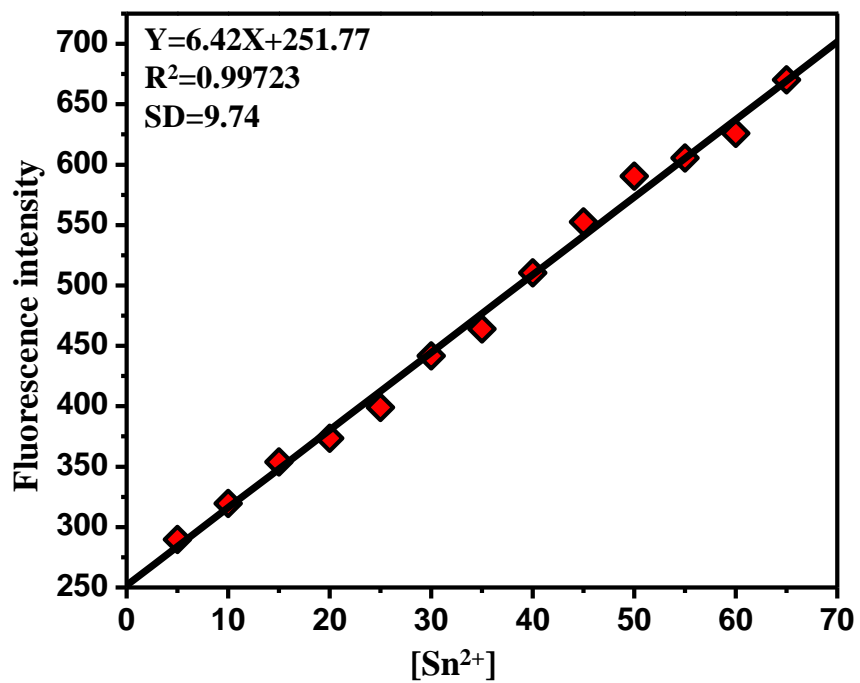

Fig.S35. Plot of  $\Delta F$  as function of concentration of  $\text{Sn}^{2+}$



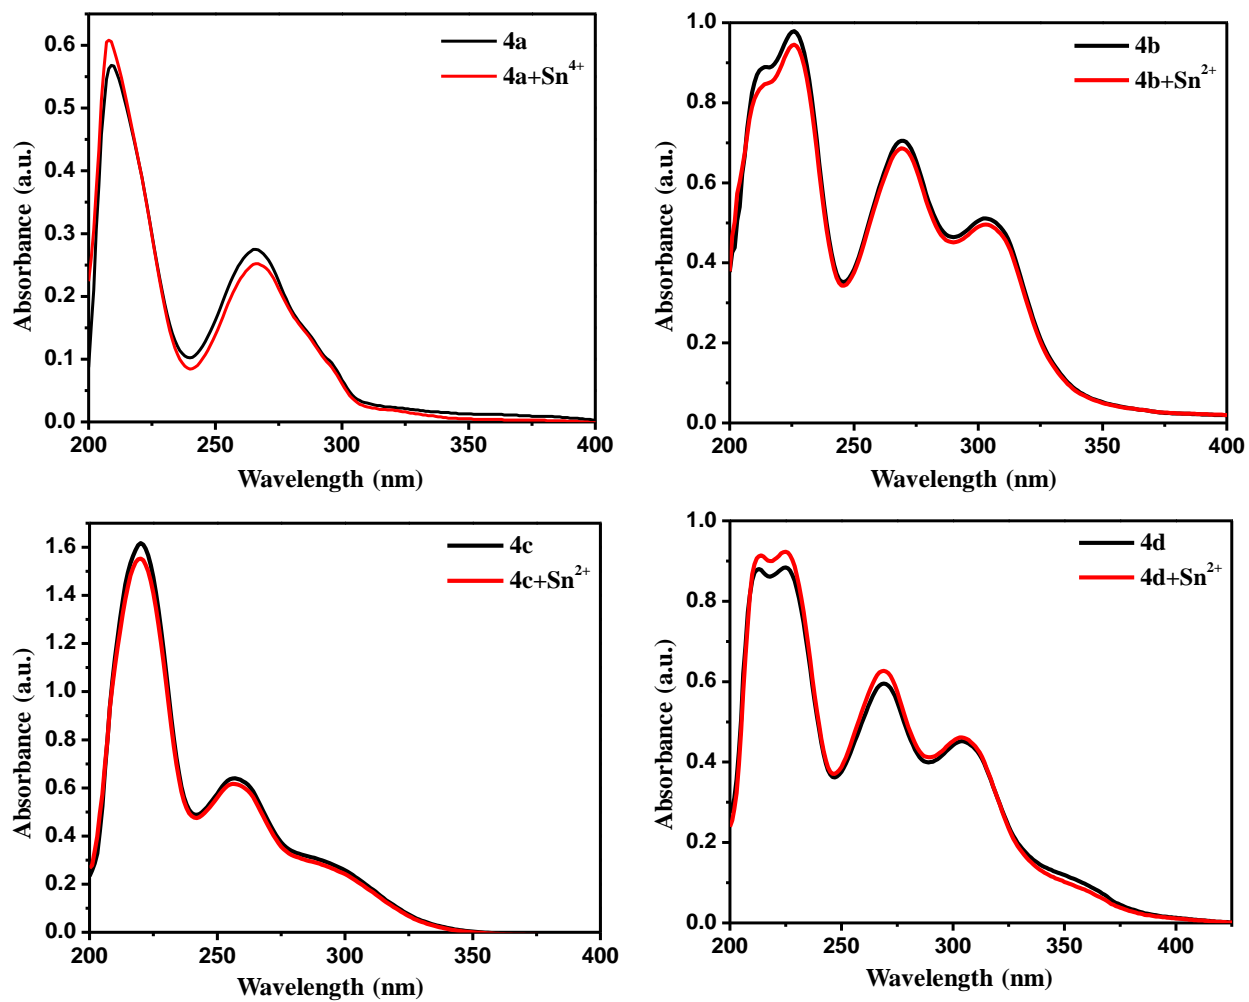

**Fig.S36.** UV-visible absorption spectra of the compounds 4(a-d) in presence of Sn<sup>4+</sup> ions in methanol
